1 **Ventral Pallidum GABA Neurons Mediate Motivation Underlying Risky Choice**

2 Running Title: VP GABA in Motivation During Risky Choice

3 <sup>1</sup>Farrell, M.R., <sup>1</sup>Esteban, J.S.D., <sup>2</sup>Faget, L., <sup>3</sup>Floresco, S.B., <sup>2,4</sup>Hnasko, T.S., & <sup>1</sup>Mahler, S.V.

4

5 **Affiliations:**

6 <sup>1</sup>Department of Neurobiology & Behavior  
7 University of California, Irvine  
8 1203 McGaugh Hall  
9 Irvine, CA 92697

10

11 <sup>2</sup>Department of Neurosciences  
12 University of California, San Diego  
13 9500 Gilman Drive  
14 La Jolla, CA 92093

15

16 <sup>3</sup>Department of Psychology  
17 University of British Columbia  
18 Vancouver Campus  
19 2136 West Mall  
20 Vancouver, BC Canada V6T 1Z4

21

22 <sup>4</sup>VASDHS Research Service  
23 3350 La Jolla Village Dr  
24 San Diego, CA 92161

25

26

27 **Corresponding Author:** Mitchell R. Farrell, M.S., Department of Neurobiology & Behavior. University of  
28 California, Irvine, 1132A McGaugh Hall, Irvine, CA 92697, (O) (732) 589-2696, [mrfarrel@uci.edu](mailto:mrfarrel@uci.edu)

## VP GABA in Motivation During Risky Choice

29

### Abstract

30 Pursuing rewards while avoiding danger is an essential function of nervous systems. Here, we examine a  
31 new mechanism helping rats negotiate the balance between risk and reward when making high-stakes  
32 decisions. Specifically, we focus on GABA neurons within an emerging mesolimbic circuit nexus, the  
33 ventral pallidum (VP). These neurons play a distinct role from other VP neurons in simple motivated  
34 behaviors in mice, but their roles in more complex motivated behaviors is unknown. Here, we  
35 interrogate the behavioral functions of VP<sup>GABA</sup> neurons in male and female transgenic GAD1:Cre rats  
36 (and wildtype littermates), using reversible chemogenetic inhibition. Employing a behavioral assay of  
37 risky decision making, and of the food-seeking and shock-avoidance components of this task, we show  
38 that engaging inhibitory G<sub>i/o</sub> signaling specifically in VP<sup>GABA</sup> neurons suppresses motivation to pursue  
39 highly salient palatable foods, and notably, also motivation to avoid being shocked. In contrast,  
40 inhibiting these neurons did not affect seeking of low-value food, or free consumption even of palatable  
41 food, nor did it impact unconditioned affective responses to shock. Accordingly, when rats considered  
42 whether to pursue food despite potential for shock in a risky decision-making task, inhibiting VP<sup>GABA</sup>  
43 neurons caused rats to more readily select a small but safe reward over a large but dangerous one—the  
44 first demonstration of a VP role in complex decision making. Together, results indicate that VP<sup>GABA</sup>  
45 neurons are critical for high-stakes adaptive responding that is necessary for life, but which might also  
46 malfunction in psychiatric disease.

47

48 **Significance Statement:** In a dynamic world, it is essential to implement appropriate behaviors under  
49 circumstances involving rewards, threats, or both. Here, we demonstrate a crucial role for VP<sup>GABA</sup>  
50 neurons in high-stakes motivated behavior, both in pursuit of highly valued rewards, and to avoid  
51 perceived threats. We also show that this VP<sup>GABA</sup> role in motivation impacts cognition, as inhibition of  
52 these neurons yields a conservative, risk-averse decision-making strategy. These new roles for VP<sup>GABA</sup>  
53 neurons in behavior may inform future strategies for treating addiction, and other disorders of  
54 maladaptive decision making.

## VP GABA in Motivation During Risky Choice

### 55 Introduction

56 Executing appropriate action under conflicting motivations is fundamental for survival in a dynamic  
57 world. For example, balancing appetitive and aversive motivations is essential for most animals to eat  
58 without being eaten. In humans, this interplay of motivations is required for appropriate decision  
59 making, and inappropriately balancing reward and aversion likely contributes to a variety of psychiatric  
60 disorders including addiction. Indeed, compulsive drug use and relapse in addiction can be  
61 conceptualized as desire for drugs overcoming the perceived threat of consequences, leading to poor  
62 decision making. Yet most preclinical studies explore reward in the absence of threat, or threat without  
63 reward—conditions that rarely occur in the life of opportunistic prey species like rodents. Understanding  
64 how functionally distinct cell populations within brain motivation circuits participate in appetitive,  
65 aversive, and also *mixed motivations* will provide novel insights into the neural substrates of both  
66 adaptive and maladaptive decision making.

67 The ventral pallidum (VP) is at an anatomical interface of motivation and action (Heimer et al., 1982),  
68 ideally positioned to contribute to behavioral responses to both rewards and threats. Across species, VP  
69 neurons encode the motivational value of specific actions that result in reward, in a manner that reflects  
70 whether such actions are worth generating (Pessiglione et al., 2007; Tindell et al., 2009; Tachibana and  
71 Hikosaka, 2012; Richard et al., 2016; Fujimoto et al., 2019). VP also plays a causal role in reward, as  
72 pharmacological stimulation enhances spontaneous food intake (Stratford et al., 1999; Smith et al.,  
73 2009) and hedonic evaluations of taste (Berridge and Kringelbach, 2015), whereas perturbing VP  
74 disrupts conditioned motivation (McAlonan et al., 1993; Chang et al., 2015), and reward-related working  
75 memory (Floresco et al., 1999). Notably, VP also plays a crucial role in seeking of multiple classes of  
76 addictive drugs (Rogers et al., 2008; Mahler et al., 2014; Farrell et al., 2019; Heinsbroek et al., 2019;  
77 Prasad and McNally, 2020).

78 However, it has recently become clear that VP not only contributes to reward, but also to aversive  
79 motivational processes. Pharmacological disinhibition of VP neurons generates spontaneous defensive  
80 behavior in rats (Smith and Berridge, 2005), and disrupts the ability of monkeys to avoid a cued aversive  
81 airpuff (Saga et al., 2016). Perhaps relevant to this are recent reports revealing that a glutamatergic  
82 subpopulation of VP neurons mediates aversive motivation and learning in mice—firing in response to  
83 aversive stimuli, promoting avoidance and curtailing reward seeking when optogenetically stimulated,  
84 and having opposite effects when optogenetically inhibited (Faget et al., 2018; Tooley et al., 2018;  
85 Heinsbroek et al., 2019; Stephenson-Jones et al., 2020).

86 In contrast to VP glutamate neurons, VP<sup>GABA</sup> neurons have instead been linked to reward seeking and  
87 approach responses in mice. For example, photostimulating VP<sup>GABA</sup> neurons is reinforcing, and induces  
88 food intake (Zhu et al., 2017; Faget et al., 2018; Stephenson-Jones et al., 2020). VP<sup>GABA</sup> neurons also  
89 selectively fire to reward cues, and their activity is required for operant reward seeking, but not  
90 avoidance responses (Stephenson-Jones et al., 2020). These results support the notion of extensive  
91 functional heterogeneity amongst VP cell populations (Smith and Berridge, 2005; Mahler et al., 2014;  
92 Root et al., 2015), and show that VP<sup>GABA</sup> neurons play a distinct, though still poorly characterized role in  
93 behavior.

94 Here we systematically characterize the behavioral functions of VP<sup>GABA</sup> neurons, in transgenic GAD1:Cre  
95 rats. Using validated, specific, and reversible chemogenetic inhibition of VP<sup>GABA</sup> neurons, we show they  
96 mediate both highly motivated pursuit of salient foods, and avoidance of shock. In contrast, inhibiting

## VP GABA in Motivation During Risky Choice

97 these cells does not affect shock-induced aversion, low-motivation food seeking, free food consumption,  
98 or locomotion. Notably, when rats were asked to make choices about food under threat of shock, VP<sup>GABA</sup>  
99 inhibition shifted choice bias towards a more risk averse strategy, increasing preference for small/safe  
100 rewards over large/risky ones. Together, these results show that VP<sup>GABA</sup> neurons govern valence-  
101 independent motivational processes underlying risky decision making.

102

103

## Methods

### 104 Subjects

105 Male ( $n = 35$ ) and female ( $n = 26$ ) Long-Evans hemizygous GAD1:Cre rats (Sharpe et al., 2017; Gibson et  
106 al., 2018; Wakabayashi et al., 2019) and their Cre-negative wildtype littermates (WT) were pair-housed  
107 in polycarbonate tub-style cages (48 × 20 × 27 cm) with bedding and nesting material. Rats were  
108 maintained on a reverse 12 hr light-dark cycle. Water was available *ad libitum* and food was restricted to  
109 ~90% of free-feeding weight during behavioral testing (~6-9 g/day/rat), unless otherwise noted. During  
110 food restriction, food was placed in the homecage after each behavioral testing session. The cohorts of  
111 rats used for each of the behavioral tasks, and the chronological ordering of behavioral testing is  
112 presented in **Figure 2-1**. All procedures were approved by the University of California Irvine Institutional  
113 Animal Care and Use Committee, and are in accordance with the NIH Guide for the Care and Use of  
114 Laboratory Animals.

### 115 Chemogenetic Methods

#### 116 Surgery and Viral Vectors

117 Rats were anesthetized with ketamine (56.5 mg/kg) and xylazine (8.7 mg/kg), and treated for pain with  
118 meloxicam (1.0 mg/kg). An adeno-associated vector containing double-flxed, inverted open reading  
119 frame (DIO) mCherry-tagged hM4Di designer receptors (Armbruster et al., 2007) (DREADDs; AAV2-hSyn-  
120 DIO-hM4D(Gi)-mCherry; titer:  $1 \times 10^{12}$  GC/mL; Addgene) was injected bilaterally into VP (relative to  
121 bregma: AP 0.0 mm, ML  $\pm 2.0$  mm, DV -8.2 mm; ~300 nL/hemisphere) using a Picospritzer and glass  
122 micropipette. Injections occurred over 1 min, and the pipette was left in place for 5 min after injection  
123 to limit spread. Both GAD1:Cre and WT rats were injected with the active hM4Di DREADD virus, and lack  
124 of hM4Di/mCherry expression was confirmed in each WT.

125

#### 126 Drugs

127 Clozapine-N-oxide (CNO) was obtained from NIDA, and subsequently stored at 4°C in powder aliquots  
128 stored in desiccant, and protected from light. CNO was dissolved in a vehicle containing 5% dimethyl  
129 sulfoxide (DMSO) in saline, and injected at 5 mg/kg intraperitoneally (IP), 30 min prior to tests. For  
130 microinjections, bicuculline methiodide (Sigma) was dissolved in artificial cerebrospinal fluid  
131 (ThermoFisher), stored in aliquots at -20°C, and thawed just prior to use.

132

### 133 DREADD Validation

#### 134 Localization of DREADD Expression to VP

135 Virus expression in GAD1:Cre rats was amplified with mCherry immunohistochemistry, and sections  
136 were co-stained for substance P, an anatomical marker of VP borders. First, behaviorally-tested rats  
137 were perfused with cold 0.9% saline and 4% paraformaldehyde after completion of experiments. Brains  
138 were cryoprotected in 20% sucrose, sectioned at 40  $\mu$ m, and blocked in 3% normal donkey serum PBST.  
139 Tissue was incubated 16 hrs in rabbit anti-substance P (ImmunoStar; 1:5000) and mouse anti-mCherry

## VP GABA in Motivation During Risky Choice

140 antibodies (Clontech; 1:2000) in PBST-azide with 3% normal donkey serum. After washing, slices were  
141 incubated in the dark for 4 hrs in Alexafluor donkey anti-Rabbit 488 and donkey anti-Mouse 594  
142 (Thermofisher), then washed, mounted, and coverslipped with Fluoromount (Thermofisher). mCherry  
143 expression was imaged at 10x, and the zone of expression in each hemisphere of each rat was mapped  
144 in relation to VP borders, and a rat brain atlas (Paxinos and Watson, 2006).

145

### 146 Localization of DREADDs Specifically to VP<sup>GABA</sup> Neurons

147 Experimentally-naïve GAD1:Cre rats ( $n = 4$ ) injected in VP with AAV2-hSyn-DIO-mCherry were  
148 euthanized, and fresh brains were immediately extracted and frozen in isopentane before storage at  
149  $-80^{\circ}\text{C}$ . Brains were serially cut ( $20\ \mu\text{m}$ ) on a cryostat and placed directly onto slides before storage at  
150  $-80^{\circ}\text{C}$ . Three different coronal sections of the VP near the center of mCherry expression were used per  
151 brain. In situ hybridizations were performed using the RNAscope Multiplex Fluorescent Assay (Advanced  
152 Cell Diagnostics). RNA hybridization probes included antisense probes against rat *Gad1* (316401-C1), rat  
153 *Slc17a6* (317011-C3) and *mCherry* (431201-C2) ( $n = 2$ ), or antisense probes against rat *Gad1* (316401-  
154 C1), rat *Slc32a1* (424541-C3) and *mCherry* (431201-C2) ( $n = 2$ ), respectively labeled with alexa488,  
155 atto647 and atto550 fluorophores. DAPI was used to label nuclei and identify cells. Three  
156 images/hemisphere/section were taken at 63x (1.4 NA) magnification using a Zeiss AxioObserver Z1  
157 widefield Epifluorescence microscope with a Zeiss ApoTome 2.0 for structured illumination and Zen Blue  
158 software for counting. Wide-field images were taken at 20x (0.75 NA) magnification. Cells that exhibited  
159 at least 4 puncta (RNA molecules) in addition to DAPI were counted as expressing the respective gene.

160

### 161 DREADD-Dependent Inhibition of VP<sup>GABA</sup> Neurons by CNO

162 In order to verify the ability of CNO to inhibit VP neurons in a DREADD-dependent manner, we tested  
163 the ability of systemic CNO to inhibit exogenously-stimulated VP neural activity. Experimentally-naïve  
164 GAD1:Cre rats ( $n = 3$ ) were injected unilaterally with the previously described AAV2 DIO-hM4Di-mCherry  
165 vector in VP, and contralaterally in VP with a matched AAV2 DIO-mCherry control vector ( $4.7 \times 10^{12}$   
166 GC/mL, AddGene). Three weeks later, bilateral intracranial cannulae were implanted 2 mm dorsal to the  
167 injection target, using previously described procedures (Mahler et al., 2013a; Mahler et al., 2014;  
168 Mahler et al., 2019), and rats recovered for 5 d. Rats were then injected with CNO, in order to engage  
169 unilaterally expressed VP<sup>GABA</sup> hM4Di receptors. 30 min later, rats were bilaterally injected in VP with 0.3  
170  $\mu\text{l}$  of bicuculline ( $0.01\ \mu\text{g}/0.5\ \mu\text{L}/50\ \text{sec}$ ), inducing neural activity in the local VP area in both  
171 hemispheres. 90 min later, rats were perfused, and brains were processed for Fos and mCherry to  
172 determine whether bicuculline-induced Fos was suppressed by hM4Di activation (i.e. if there was less  
173 Fos expression in the hM4Di hemisphere than the mCherry hemisphere). VP sections near the center of  
174 the microinjection sites were incubated overnight at room temperature in rabbit anti-Fos (1:5000;  
175 Millipore) and mouse anti-DSRed (targeting mCherry; 1:2000; Clontech), washed, incubated in  
176 Alexafluor donkey anti-Rabbit 488 and donkey anti-Mouse 594 in dark for 4 hrs at room temperature,  
177 then coverslipped as above. For each rat, 2-3 brain sections/hemisphere/rat with VP-localized  
178 microinjector tip damage were selected for manual quantification at 10x magnification by an observer  
179 blind to experimental manipulation. mCherry-only, and mCherry/Fos co-expressing cells within VP  
180 borders (Paxinos and Watson, 2006) were counted in both hemispheres. The percentage of mCherry  
181 cells co-expressing Fos in each sample was calculated, and per-hemisphere averages were computed for  
182 each rat for statistical analysis.

## 183 **Behavioral Testing Methods**

### 184 Risky Decision-Making Task

## VP GABA in Motivation During Risky Choice

185 *Operant Apparatus.* All operant testing was performed in Med Associates operant chambers in sound-  
186 attenuating boxes, equipped with two retractable levers with associated stimulus lights above them.  
187 Between the two levers was a food magazine connected to a food pellet dispenser. Two nose-poke ports  
188 were positioned on the opposite wall with a yellow light in one of the ports. Boxes were equipped with  
189 tone/white noise and footshock generators.

190 *Habituation Training.* We adapted a previously-reported risky decision task and associated training  
191 protocol (Simon et al., 2009; Simon and Setlow, 2012; Orsini et al., 2015a). Mildly food deprived male ( $n$   
192 = 23) and female rats ( $n$  = 22) were familiarized in their homecages to highly-palatable banana-flavored  
193 pellets (45 mg, Bio-Serv), then on day 1 of training, 38 pellets were delivered into the food magazine on  
194 a variable time 100 sec schedule (140 sec, 100 sec, 60 sec) during a single ~60 min session. Rats that  
195 failed to eat >19 pellets were given a second day of magazine training.

196 *Lever Pressing Training.* Next, rats were trained to lever press for the banana pellets in daily 30 min  
197 sessions. Each session began with illumination of the house light, and extension of a single lever plus  
198 illumination of the associated stimulus light (right or left, counterbalanced). One pellet and a brief  
199 auditory cue (0.5 sec 2.9 kHz tone) were delivered on a fixed ratio 1 (FR1) schedule, with a 10 sec  
200 timeout period between pellet deliveries. Daily FR1 training continued until criterion (50 pellet/30 min  
201 session), followed by training on the alternate (left or right) lever, again until criterion.

202 *Lever Choice Training.* The next training phase consisted of daily 1 hr sessions that taught rats to press  
203 the lever within 10 sec of extending them. Sessions began with illumination of the houselight, and every  
204 40 sec one lever (right or left) was extended for 10 sec, along with the associated stimulus light. Lever  
205 presses yielded 1 food pellet, and the same tone cue. If no press occurred during the 10 sec extension  
206 window, the lever retracted and stimulus light extinguished, the trial was counted as an omission, and  
207 rats were required to wait until the next lever extension trial. Each session consisted of 35 left lever, and  
208 35 right lever extensions with a 40 sec intertrial interval, independent of the rats' pressing or omitting.  
209 Rats that met criterion (<10 omissions) on two consecutive sessions were moved to the next phase of  
210 the task. In this phase procedures were the same, except that now pressing one lever (left or right,  
211 counterbalanced) delivered 1 pellet accompanied by one tone cue, and pressing the other lever  
212 delivered 2 pellets with each pellet delivery accompanied by the same tone cue. Rats were trained for at  
213 least 3 d in this manner, until 2 consecutive days with <10 omissions.

214 *Risky Decision Task.* Rats were next trained on the risk task, in which the threat of shock was introduced.  
215 At session start, as above one lever yielded 1 pellet, and the other 2 throughout the session. However,  
216 now the 2-pellet option came with the chance of concurrently-delivered shock; the probability of which  
217 increased over the course of the session. Sessions consisted of 5 training blocks with 20 trials each, for a  
218 total of 66 min. Blocks represent changes in footshock probability associated with large/risky lever  
219 presses such that in the first 20-trial block there was no chance of shock, and in each subsequent block  
220 shock probability increased by 25% (Block 1: 0% probability, Block 2: 25%, Block 3: 50%, Block 4: 75%,  
221 Block 5: 100%). Each 20-trial block began with 8 'forced choice' trials in which a single lever was  
222 extended (4 large/risky and 4 small/safe lever extensions, random order) to establish the shock  
223 contingency for that block. Following the 8 forced choice trials, 12 'free choice' trials commenced in  
224 which both the large/risky and small/safe levers were extended simultaneously to allow choice of the  
225 preferred option (small/safe; large/risky). If no lever press occurred within 10 sec, the lever(s) were  
226 retracted, stimulus light(s) extinguished, and the trial was considered to be omitted. Footshock intensity  
227 (mA) was titrated individually for each rat to ensure sufficient parametric space to observe either  
228 increases or decreases in risky choice, as reported previously (Orsini et al., 2017). Footshock intensity

## VP GABA in Motivation During Risky Choice

229 started at 0.15 mA for each rat upon beginning the risky decision task, and percent choice of the  
230 large/risky reward was monitored daily for fluctuations in decision making. Footshock intensity was  
231 increased or decreased each day by 0.05 mA, until stable decision making behavior was achieved across  
232 animals.

233 *Stable Pre-Test Baseline Performance:* Rats generally achieved stability within 10-20 sessions, with near-  
234 exclusive choice of the “risky” 2 pellet option when chance of shock was zero, and parametrically  
235 shifting to the “safe” 1 pellet option as shock probability increased (interaction of block X lever:  $F_{(4, 132)} =$   
236  $111.5, p < 0.0001$ ). Rats were trained until performance was stable for 5 consecutive days (no difference  
237 in 5 d average performance pre-vehicle/CNO:  $F_{(1, 229)} = 0.45, n.s.$ ; or interaction of block x treatment:  $F_{(4,$   
238  $229)} = 0.023, n.s.$ ), then assigned to receive counterbalanced vehicle and CNO tests, between which,  
239 behavior was re-stabilized over ~ 5 days of training. Over the course of these experiments, 6 rats made  
240 >50% omissions during vehicle treatment sessions (range 50-72 omissions over 100 trials), making  
241 interpretation of their data problematic. Accordingly, their data were excluded from risky decision  
242 analyses ( $n = 6$ ).

243

### 244 Reward Magnitude Discrimination

245 To characterize potential VP inhibition effects on preference for larger versus smaller rewards, a  
246 separate cohort of GAD1:Cre rats ( $n = 8$ ) were trained identically to above, up to the point of introducing  
247 shock. We then evaluated CNO effects (versus vehicle) on choice of the 2-pellet lever over the 1-pellet  
248 lever, in the absence of shock. Rats required ~5-10 training sessions before displaying stable preference  
249 for the larger reward, after which they received CNO and vehicle tests on separate days. After the first  
250 test, rats received ~3 days of training to re-stabilize performance and were then given their second  
251 counterbalanced treatment.

252

### 253 Spontaneous Palatable Food Intake

254 *Ad libitum*-fed rats ( $n = 18$ ) were placed in polycarbonate cages (44.5 x 24 x 20 cm) with bedding and  
255 ~12 g of peanut butter M&M chocolates for 1 hr on 2 consecutive days, to habituate them to test  
256 conditions. The next day, rats were administered CNO or vehicle (counterbalanced, separate days) 30  
257 min prior to a 1 hr intake test. 48 hrs later the procedure was repeated with the other drug treatment.  
258 Food intake (g) was measured.

259

### 260 High Effort Instrumental Responding for Palatable Food

261 To assess the involvement of the VP in food seeking under higher effort requirements, mildly food-  
262 deprived rats ( $n = 39$ ) were trained to nosepoke on a progressive ratio schedule of reinforcement.  
263 Sessions began with illumination of the both the houselight and a light within the active nosepoke port.  
264 When the required schedule was achieved, 3 banana pellets + 3 concurrently-delivered 0.5 sec white  
265 noise pulses were delivered. The number of nosepokes required for reward increased each time the  
266 prior requirement was achieved (FR 1, 6, 15, 20, 25, 32, 40, 50, 62, 77, 95, 118, 145, 178, 219, 268, 328,  
267 402, 492, 603 (Smith and Aston-Jones, 2012)). Inactive port entries were inconsequential, but recorded.  
268 Sessions lasted a maximum of 2 hrs, or less if the rat failed to reach the next ratio within 20 min of  
269 achieving the prior one. Training continued until rats achieved stable performance for 2 consecutive  
270 sessions (<25% change in active nosepokes). Pressing was re-stabilized between counterbalanced  
271 vehicle/CNO tests.

272

### 273 Low Effort Instrumental Responding for Palatable Food or Conventional Chow

## VP GABA in Motivation During Risky Choice

274 Mildly-food deprived rats or *ad libitum* fed rats ( $n = 16$ ) were trained to nosepoke for palatable 45 mg  
275 banana pellets on an FR1 schedule of reinforcement during daily 1 hr sessions. Separate animals ( $n = 8$ )  
276 were trained to respond for 45 mg chow pellets instead using the same procedures. Sessions began with  
277 illumination of the houselight and active nosepoke port light. Active nosepokes resulted in delivery of a  
278 pellet into the food cup, while inactive nosepokes were without consequence. Rats were trained until  
279 achieving stability (<25% change in active nosepokes) for 2 consecutive sessions (2-7 sessions).

280

### 281 Operant Shock Avoidance/Escape Task

282 Procedures were adapted from a previously described shock avoidance/escape task (Oleson et al.,  
283 2012). Rats ( $n = 18$  trained; male = 13, female = 5) that had previously performed the risky decision  
284 task, progressive ratio task, and palatable food FR1 task were tested, and footshock intensity (mA) was  
285 the same as that used for the rat during the previously-trained risk task (0.15-45 mA). Each 30 min  
286 session began with illumination of the houselight, and every 20 sec an active and inactive lever were  
287 extended. Initial training taught rats to press a lever to turn off a repeated foot shock. During this initial  
288 'escape only' training, lever extension was met with a concurrent footshock that repeated (0.1 sec  
289 footshock every 2 sec) until the active lever was pressed, upon which both active and inactive levers  
290 were retracted, footshock ceased, and a 20 sec white noise safety signal was played. Then the next trial  
291 began, signaled with extension of both levers, until the end of the 30 min session. Training proceeded  
292 for at least 2 d, until consistent escape behavior was observed.

293

294 Next, rats were trained to avoid, as well as to escape shocks in 30 min sessions. In this phase, levers  
295 were again extended, but now this occurred 2 sec prior to initiation of shocks. If the active lever was  
296 pressed in this 2 sec period (an avoid response), levers retracted, the safety signal was played for 20 sec,  
297 and no shock occurred. If no press occurred before 2 sec elapsed, repeating footshock commenced as  
298 above, until an active lever press occurred (escape response), at which time levers were retracted and  
299 the safety signal was played for 20 sec. Inactive lever presses were inconsequential but recorded. Rats  
300 with >5 avoidance lever presses on the vehicle test day were included for analyses ( $n = 18$ ). Data were  
301 analyzed by 1) assessing the change from 1 d pretest baseline of the ratio between avoidance presses  
302 and escape presses (i.e. change from baseline avoidance%), 2) ratio between avoidance presses and  
303 escape presses on vehicle and CNO tests (i.e. raw avoidance%), 3) latency to avoid footshock, and 4)  
304 latency to escape repeated footshock. Rats were administered counterbalanced vehicle and CNO tests  
305 30 min prior to avoidance/escape sessions, with ~ 3 d between tests to re-stabilize behavior.

306

### 307 Motor Responses to Shock

308 To query the overt motor reactivity to shock, rats ( $n = 16$ ) were tested for motor reactions to shocks of  
309 ascending intensity, tested in an unfamiliar chamber. The houselight was illuminated and 2 min elapsed.  
310 This waiting period ended with one 0.30 mA footshock to limit ongoing exploration. Following this  
311 shock, rats were administered 5 consecutive 1 sec, 0.05 mA shocks, each separated by 10 sec. After  
312 these 5 shocks, the procedure was repeated with blocks of increasingly intense shocks, increasing by  
313 0.05 mA with each block. Motor reactivity was evaluated during testing, according to previously  
314 published criteria (Bonnet and Peterson, 1975). Briefly, motor reactivity was separated into 4 categories:  
315 0: no movement, 1: flinch of a paw or a startle response, 2: elevation of one or two paws, 3: rapid  
316 movement of three or all paws. When 3 out of 5 shocks at a particular intensity elicited level 3+ motor  
317 reactivity, the session was terminated. CNO/vehicle tests were counterbalanced and administered 48  
318 hrs apart.

319

### 320 Ultrasonic Vocalization Responses to Shock



## VP GABA in Motivation During Risky Choice

321 To further query the affective response of rats to shock, rats ( $n = 16$ ) were administered 2 shock-induced  
322 ultrasonic vocalization tests after counterbalanced vehicle or CNO, held 48 hrs apart. Recordings  
323 occurred in unfamiliar chambers. Sessions began with illumination of the houselight, and following a 2  
324 min baseline period, rats received 5 unsignaled footshocks (1 sec, 0.75 mA), each separated by 1 min.  
325 Recordings were made with condenser ultrasound microphones (frequency range: 10–200 kHz;  
326 CM16/CMPA, Avisoft Bioacoustics, Berlin, Germany) that were centered atop the operant chamber and  
327 pointed directly toward the center of the chamber (~18 cm above the floor). USV recordings were made  
328 on an UltraSoundGate 416H data acquisition device (Avisoft Bioacoustics; sampling rate 250 kHz; 16-bit  
329 resolution), as reported previously (Mahler et al., 2013b). Spectrograms were visualized using Avisoft  
330 software, and ultrasonic vocalizations (USVs) were manually quantified by an observer blind to  
331 experimental conditions. Aversion-related 22 kHz USVs were operationalized as 18-30 kHz with a  
332 duration greater than 10 ms, and positive affect-related high frequency USVs were operationalized as  
333 those >30 kHz frequency, with a duration greater than 10 ms.

334

### 335 General Locomotor Activity

336 General locomotor activity was assessed in a locomotor testing chamber with corncob bedding (43 × 43  
337 × 30.5 cm). Following two daily 2 hr habituation sessions, infrared beams captured horizontal distance  
338 traveled and number of vertical rears following vehicle/CNO injections (counterbalanced tests, 48 hrs  
339 apart).

340

### 341 Statistics and Analyses

342 Graphpad Prism was used for all statistical analyses. CNO and vehicle tests were counterbalanced for  
343 each experiment. An independent sample *t*-test was used to compare %Fos in ipsilateral mCherry+ VP  
344 neurons versus %Fos in contralateral hM4Di-mCherry neurons following bicuculline microinjection and  
345 systemic CNO injection. Male and female footshock intensities required on the risky decision task were  
346 compared with an independent sample *t*-test. For the risky decision task, reward magnitude  
347 discrimination, and motor shock reactivity tasks, effects of CNO versus vehicle in GAD1:Cre and WT rats'  
348 data were analyzed with separate two-way ANOVAs with Sidak posthoc tests. For latency to press the  
349 small/safe and large/risky option, separate one-way ANOVAs were conducted to determine whether  
350 latency increased across the session when tested with vehicle treatment. For avoidance/escape task,  
351 FR1, and progressive ratio tasks, effects of CNO versus vehicle in GAD1:Cre and WT rats were analyzed  
352 with paired sample *t*-tests. Due to the high variability in USV production among rats, all USV data were  
353 analyzed as percent of vehicle test day, and compared to 100% with one-sample *t*-test. Two-tailed tests  
354 with a significance threshold of  $p < 0.05$  were used for all analyses.

355

356

## Results

### 357 **Selective, Functional hM4Di Expression in VP<sup>GABA</sup> Neurons**

358 GAD1:Cre rats exhibited hM4Di-mCherry expression that was largely localized within defined VP borders  
359 (**Fig 1A-B**). Specifically, at the center of expression, mean  $\pm$  SEM = 67.1%  $\pm$  1.8 of total viral expression  
360 area was localized within VP, and 66.9%  $\pm$  1.7 of substance P-defined VP area contained mCherry  
361 expression in behaviorally tested rats. Verifying specificity of expression, we used RNAscope to show  
362 that mCherry mRNA was largely colocalized with GABA-specific markers *gad1* and *vgat* mRNA in VP (**Fig**  
363 **1C-E**, mCherry+*gad1*+:  $m = 91.28 \pm 2.6$ ; mCherry+*vgat*+:  $m = 91.58 \pm 2.75$ ). The vast majority of these  
364 neurons were triple labeled for *mCherry*, *gad1*, and *vgat* (mCherry+*gad1*+*vgat*+:  $m = 87.92 \pm 2.58$ ),  
365 indicating robust expression in GABAergic VP neurons. Little mCherry expression was detected in

## VP GABA in Motivation During Risky Choice

366 vglut2+ neurons (mCherry+vglut2+:  $m = 8.42 \pm 3.42$ ), and of these mCherry+vglut2+ cells, 40.6% also  
367 localized with *gad1* (mCherry+vglut2+*gad1*+:  $m = 3.42 \pm 1.08$ ), possibly indicating co-expression of GABA  
368 and glutamate in some VP neurons (Faget et al., 2018; Farrell et al., 2019).

369  
370 To verify that hM4Di DREADDs measurably inhibit neural activity in VP<sup>GABA</sup> neurons, we administered  
371 CNO systemically to GAD1:Cre rats ( $n = 3$ ) with unilateral VP GAD1-dependent expression of  
372 hM4Di+mCherry, and contralateral VP GAD1-dependent mCherry only. We then pharmacologically  
373 disinhibited VP neurons bilaterally, using microinjections of the GABA<sub>A</sub> antagonist, bicuculine (0.01  
374  $\mu\text{g}/0.5 \mu\text{L}$ ), which robustly induces VP Fos (Smith and Berridge, 2005; Turner et al., 2008). As expected,  
375 fewer mCherry+Fos VP neurons were found in the hM4Di-expressing hemisphere than the mCherry  
376 hemisphere (**Fig 1F**;  $t_2 = 18.12$ ,  $p = 0.003$ ), despite the fact that cannulae localizations were equivalent in  
377 each hemisphere. These results demonstrate that CNO, via actions at hM4Di, is capable of suppressing  
378 Fos in pharmacologically disinhibited VP<sup>GABA</sup> cells, presumably by recruiting endogenous G<sub>i/o</sub> signaling  
379 (Pleil et al., 2015; Roth, 2016).

### 380 Inhibiting VP<sup>GABA</sup> Neurons Reduces Risky Choices

381 Rats performed the risk task as expected, shifting their choices from the large reward when chance of  
382 shock was low, to the smaller but unpunished reward as the probability of shock increased (**Fig 2A**;  
383 GAD1:Cre rats main effect of block:  $F_{(4, 96)} = 40.68$ ,  $p < 0.0001$ ; rats:  $F_{(4, 32)} = 13.4$ ,  $p < 0.0001$ ). Male rats  
384 required higher average shock intensities relative to female rats (**Fig 2B**,  $t_{40} = 5.6$ ,  $p < 0.0001$ ), as  
385 reported previously (Orsini et al., 2016). However, after individualized titration, males and females  
386 performed equivalently; similarly shifting their choice from the large/risky to the small/safe reward  
387 option as shock probability increased (block:  $F_{(4, 179)} = 76.5$ ,  $p < 0.0001$ ). Importantly, no sex differences  
388 were detected for percent choice of the risky option during (**Fig 2C**, sex:  $F_{(1, 179)} = 0.19$ , n.s.; block x sex  
389 interaction:  $F_{(4, 179)} = 0.07$ , n.s.). In GAD1:Cre rats, CNO reduced choice of the large, risky reward option  
390 (**Fig 2D**, treatment:  $F_{(1, 24)} = 4.62$ ,  $p = 0.042$ ), and this suppression of choice of the large reward was  
391 statistically equivalent across shock probabilities (treatment x block interaction:  $F_{(4, 96)} = 0.95$ , n.s.). CNO  
392 also increased the total number of omitted trials, especially in the blocks with the highest probability of  
393 shock (**Fig 3A**, treatment x block interaction:  $F_{(4, 96)} = 11.91$ ,  $p < 0.0001$ ; Sidak posthoc: 50% block:  $p =$   
394  $0.0006$ ; 75%:  $p < 0.0001$ ; 100%:  $p < 0.0001$ ). As expected, latency to press the large/risky reward option  
395 increased as the footshock probability increased (one-way ANOVA for vehicle day data:  $F_{(4, 118)} = 7.21$ ,  $p <$   
396  $0.0001$ ), which did not occur for latency to press the small/safe reward option ( $F_{(4, 119)} = 1.44$  n.s.). CNO  
397 selectively increased the latency to press the large/risky reward option (**Fig 3B**, treatment:  $F_{(1, 231)} = 13.5$ ,  
398  $p = 0.0003$ ), especially when the uncertainty of footshock was maximum; during the 50% footshock  
399 block (Sidak posthoc:  $p = 0.0053$ ). In contrast, CNO failed to impact latency to press the small/safe  
400 reward option (**Fig 3C**,  $F_{(1, 237)} = 1.29$ ,  $p = 0.26$ ). In addition, due to decreased pressing of the large/risky  
401 option and increased omissions, CNO-treated GAD1:Cre rats obtained fewer rewards overall than on  
402 vehicle day (treatment:  $F_{(1, 24)} = 6.95$ ,  $p = 0.015$ , data not shown).

403

### 404 VP<sup>GABA</sup> Inhibition Effects are Specific: No Effect on Reward Magnitude Discrimination

405 Reward Magnitude Discrimination: A separate group of rats were trained as described above, but in the  
406 absence of shock, to confirm their ability to discriminate reward magnitude after VP<sup>GABA</sup> neuron  
407 inhibition. As expected, GAD1:Cre rats nearly exclusively chose the large reward over the small one  
408 during training, and after vehicle treatment (vehicle test large versus small:  $t_7 = 11.11$ ,  $p < 0.0001$ ). After  
409 CNO, GAD1:Cre rats showed a nearly identical preference as on their vehicle test day (**Fig 4A**, treatment:  
410  $F_{(1, 56)} = 1.08$ , n.s.), showing that VP<sup>GABA</sup> inhibition does not affect rats' preference for a large reward over  
411 a small one. This said, as in the task where the larger reward was associated with a probabilistic shock,

## VP GABA in Motivation During Risky Choice

412 CNO increased omissions (**Fig 4B**, treatment x block interaction:  $F_{(4, 24)} = 4.0$ ,  $p = 0.013$ ) and decreased  
413 total rewards obtained (**Fig 4C**, treatment x block interaction  $F_{(4, 24)} = 3.73$ ,  $p = 0.017$ ), consistent with an  
414 overall reduction in motivation. Posthoc tests revealed that CNO increased omissions only in the 3<sup>rd</sup>  
415 (Sidak posthoc:  $p < 0.01$ ) and 4<sup>th</sup> (Sidak posthoc:  $p < 0.05$ ) block, and similarly only decreased rewards  
416 obtained in the 3<sup>rd</sup> (Sidak posthoc:  $p < 0.01$ ) and 4<sup>th</sup> (Sidak posthoc:  $p < 0.05$ ) block. Emergence of satiety  
417 likely accounts for why the 5<sup>th</sup> block of trials converged for both omissions and rewards obtained, as a  
418 significant main effect of block was observed for both omissions ( $F_{(4, 24)} = 21.4$ ,  $p < 0.001$ ) and rewards  
419 obtained ( $F_{(4, 24)} = 19.4$ ,  $p < 0.001$ ). However, CNO did not impact latency relative to vehicle (treatment:  
420  $F_{(1, 59)} = 0.86$ , n.s.), unlike in the shock version of the task, where CNO selectively increased latency to  
421 press the large/risky lever. The lack of effect on choice latencies in this experiment suggest that the  
422 increased decision times observed on the risky decision task induced by VP<sup>GABA</sup> neuron inhibition were  
423 not attributable to a generalized psychomotor slowing, but rather, increased deliberation time to weigh  
424 the costs and benefits associated with the risky choice.

### 425 **Inhibiting VP<sup>GABA</sup> Neurons Suppresses Instrumental Responding for High Value Foods, without** 426 **Impairing General Locomotion**

#### 427 Similar Suppression of Palatable Food Responding During Hunger and Satiety

428 We examined effects of inhibiting VP<sup>GABA</sup> neurons on low effort (FR1) operant responding for highly  
429 palatable banana pellets. When GAD1:Cre rats were tested under mild food restriction, CNO reduced  
430 active port responding (**Fig 5A**, GAD1:Cre active port responses:  $t_9 = 2.58$ ,  $p = 0.03$ ), without affecting  
431 inactive port responding (inactive:  $t_9 = 0.79$ , n.s.). Effects of VP<sup>GABA</sup> neuron inhibition were similar when  
432 rats were tested in the same manner while maintained on *ad libitum* chow 23 hrs/day (**Fig 5B**, active  
433 port responses:  $t_9 = 2.65$ ,  $p = 0.027$ , inactive:  $t_9 = 0.97$ , n.s.), indicating that VP<sup>GABA</sup> neurons are required  
434 for low effort instrumental pursuit of a highly salient, palatable reward regardless of physiological need  
435 state.

436

#### 437 Suppression of Responding for Less-Palatable Chow Only During Hunger

438 We next examined effects of inhibiting VP<sup>GABA</sup> neurons on low effort (FR1) operant responding for  
439 standard chow pellets under hunger and satiety conditions. Inhibiting VP<sup>GABA</sup> neurons reduced active  
440 nosepokes for chow when rats were hungry (**Fig 5C**,  $t_6 = 3.12$ ,  $p = 0.021$ ), but not when they were fed *ad*  
441 *libitum* (**Fig 5D**,  $t_6 = 0.89$ , n.s.), as shown with a significant interaction between hunger state and  
442 vehicle/CNO treatment ( $F_{(1, 6)} = 6.31$ ,  $p = 0.046$ ).

443

#### 444 Robust Suppression of High-Effort Palatable Food Seeking

445 When GAD1:Cre rats were trained on a progressive ratio to stably respond for palatable banana pellets,  
446 CNO suppressed breakpoint (**Fig 6A-B**,  $t_{21} = 2.4$ ,  $p = 0.026$ ), and trended toward suppressing active port  
447 responses (vehicle:  $m = 1050 \pm 136.7$ , CNO:  $m = 847.5 \pm 122.4$ ;  $t_{21} = 2.0$ ,  $p = 0.059$ ). The low number of  
448 inactive port responses was unaffected (vehicle:  $m = 15.8 \pm 2.9$ , CNO:  $m = 18.3 \pm 4.0$ ;  $t_{21} = 0.53$ , n.s.).

449

#### 450 Non-Operant Spontaneous Intake of Palatable Food is Unaffected

451 To determine effects of VP<sup>GABA</sup> neuron inhibition on spontaneous intake of a highly palatable sweet and  
452 fatty food meal, we examined 2 hr intake of peanut butter M&M™ candies, placed directly on the floor  
453 of a familiar testing chamber. CNO failed to affect intake (g) in GAD1:Cre rats (**Fig 6C**,  $t_{11} = 1.24$ , n.s.).

454

#### 455 Locomotor Activity: Effects of VP<sup>GABA</sup> inhibition with CNO treatment failed to alter either horizontal

456 locomotion or rearing behavior in GAD1:Cre rats (locomotion, vehicle:  $m = 12026 \pm 1006$  cm, CNO:  $m =$

## VP GABA in Motivation During Risky Choice

457 13185 ± 1601 cm,  $t_{11} = 0.71$ , n.s.; rearing, vehicle:  $m = 183.6 \pm 17.1$  rears, CNO  $m = 188 \pm 22.7$  rears,  $t_{11} =$   
458 0.20, n.s.).

### 459 **Inhibiting VP<sup>GABA</sup> Neurons Decreases Motivation to Avoid Footshock Without Impacting Motor or** 460 **Affective Reactions to Shock**

#### 461 Latency to Avoid Footshock Increases after VP<sup>GABA</sup> Neuron Inhibition

462 VP<sup>GABA</sup> neuron inhibition suppressed operant risky decision making and food seeking, so we next sought  
463 to determine whether this manipulation also affects negatively reinforced operant responding. CNO did  
464 not affect the overall propensity of rats to avoid shocks rather than to escape them (**Fig 7A**, change from  
465 baseline avoidance%:  $t_{10} = 1.50$ , n.s.; raw %avoidance:  $t_{10} = 2.2$ ,  $p = 0.053$ ), suggesting that their general  
466 strategy was not altered by this manipulation. However, CNO selectively increased latency to press to  
467 avoid shock in GAD1:Cre rats (**Fig 7B**,  $t_{10} = 2.60$ ,  $p = 0.027$ ), consistent with reduced motivation to avoid  
468 impending, signaled shock. Escape latency was not similarly impacted by CNO (**Fig 7C**,  $t_{10} = 1.36$ , n.s.),  
469 indicating that rats were still fully capable of pressing to terminate an ongoing shock.

470

#### 471 No Effects on Motor or Affective Responses to Shock

472 As expected, shock-induced motor reactivity scores parametrically increased with footshock intensity  
473 (**Fig 8A**, GAD1:Cre block:  $F_{(6, 112)} = 100.9$ ,  $p < 0.0001$ ). Motor reactivity scores were not affected by CNO in  
474 GAD1:Cre rats (treatment:  $F_{(1, 112)} = 0.27$ , n.s.), nor was the maximum shock intensity endured altered  
475 (GAD1:Cre, vehicle:  $m = 0.27 \pm 0.017$  mA; CNO:  $m = 0.29 \pm 0.014$  mA;  $t_{10} = 0.94$ , n.s.).

476

#### 477 No Effect on Shock-Induced Negative Affective Vocalizations

478 We also examined aversion-related 22 kHz ultrasonic vocalizations emitted in response to repeated,  
479 moderate intensity shocks (0.75 mA/1 sec, delivered every min for 5 min). These USVs were in the  
480 frequency range of well-characterized aversion-related USVs (Knutson et al., 2002; Portfors, 2007;  
481 Mahler et al., 2013b), with a mean frequency of  $m = 23.5 \pm 1.1$  kHz, and a mean duration of  $m = 1306.4$   
482  $\pm 142.1$  ms. CNO failed to alter the number of 22 kHz vocalizations emitted in GAD1:Cre rats (**Fig 8B**, %  
483 of vehicle day USVs, compared to 100% with one sample  $t$ -test:  $t_9 = 1.5$ , n.s.). We also observed some  
484 vocalizations >30 kHz, linked to positive affect (Knutson et al., 2002; Portfors, 2007; Brudzynski, 2013).  
485 These vocalizations, however, occurred largely during the 2 min pre-footshock baseline (high frequency  
486 USVs/min on vehicle test for GAD1:Cre and WT:  $m = 46.4 \pm 14.8$ ) compared to the subsequent 5 min  
487 intermittent footshock period (high frequency USVs/min on vehicle test:  $m = 9.6 \pm 5.8$ ; pre-footshock vs.  
488 footshock period:  $t_{14} = 3.16$ ,  $p = 0.0069$ ). Production of these high frequency vocalizations was similarly  
489 unaffected by CNO treatment during the session (% of vehicle day USVs, compared to 100% with one  
490 sample  $t$ -test:  $t_9 = 1.74$ , n.s.).

491

### 492 **Minimal DREADD-Independent Effects of CNO**

493 Across all nine behavioral tasks implemented here, we saw few non-specific effects of CNO in WT rats  
494 lacking DREADD expression. In the risky decision task, administering CNO to WT rats did not affect risky  
495 choice (**Fig 2E**, treatment:  $F_{(1, 8)} = 0.055$ , n.s.), total omissions (**Fig 3D**, treatment:  $F_{(1, 8)} = 0.60$ , n.s.), total  
496 rewards obtained (treatment:  $F_{(1, 8)} = 0.044$ , n.s.), or latency to press for either large/risky (**Fig 3E**,  
497 treatment:  $F_{(1, 77)} = 2.68$ , n.s.) or small/safe rewards (**Fig 3F**,  $F_{(1, 77)} = 0.91$ , n.s.). Likewise, CNO failed to  
498 alter FR1 responding for palatable pellets in food-deprived (**Fig 5E**, active vehicle versus CNO:  $t_5 = 0.036$ ,  
499 n.s.; inactive:  $t_5 = 1.04$ , n.s.) or sated conditions (**Fig 5F**; active:  $t_5 = 1.01$ , n.s.; inactive:  $t_5 = 1.04$ , n.s.).  
500 Progressive ratio responding for palatable pellets was also unaffected (**Fig 6D-E**, breakpoint:  $t_{16} = 0.63$ ,  
501 n.s.; active nosepekes:  $t_{16} = 0.54$ , n.s.; inactive nosepekes:  $t_{16} = 0.59$ , n.s.), as was spontaneous M&M  
502 consumption (**Fig 6F**,  $t_5 = 0.41$ , n.s.). CNO alone did not appear to produce general sedation, as

## VP GABA in Motivation During Risky Choice

503 locomotion (locomotion, vehicle:  $m = 13621 \pm 2580$  cm, CNO:  $m = 16768 \pm 3039$  cm,  $t_5 = 1.02$ , n.s.) and  
504 rearing (rearing, vehicle:  $m = 197.8 \pm 29.7$  rears, CNO:  $m = 174 \pm 26.7$  rears,  $t_5 = 0.56$ , n.s.) were  
505 unaffected. Shock-induced behaviors were also largely unaffected by CNO, including motor reactions to  
506 shock (**Fig 8A**, treatment:  $F_{(1, 33)} = 0.85$ , n.s.), maximum shock intensity tolerated (vehicle:  $m = 0.22 \pm$   
507  $0.012$ ; CNO:  $m = 0.21 \pm 0.019$ ;  $t_4 = 1.0$ , n.s.), avoidance propensity (**Fig 7D**, change from baseline  
508 avoidance%;  $t_6 = 1.54$ , n.s.; though raw avoidance% was decreased by CNO in WT rats:  $t_6 = 2.9$ ,  $p =$   
509  $0.027$ ), and avoidance latency (**Fig 7E**,  $t_6 = 0.064$ , n.s.). Both 22 kHz (aversion-related) and >30 kHz  
510 (positive affect-related) USVs were unchanged by CNO in WT rats (**Fig 8B**, % of vehicle day USVs,  
511 compared to 100% with one sample  $t$ -test, 22kHz:  $t_4 = 1.0$ , n.s.; >30 kHz:  $t_4 = 0.96$ , n.s.). However, we  
512 note that CNO in WT rats trended towards increasing latency to escape (**Fig 7F**,  $t_6 = 2.2$ ,  $p = 0.07$ ).

513  
514

## Discussion

515 Here we show that VP<sup>GABA</sup> neurons play a fundamental role in high-stakes motivation, and thereby  
516 promote risky decision making strategies. Engaging Gi/o signaling in VP<sup>GABA</sup> neurons with DREADDs  
517 interfered with both operant pursuit of desirable foods, as well as operant response to cancel an  
518 impending shock. In contrast, VP<sup>GABA</sup> neurons play no apparent role in pursuit of less valuable food, in  
519 spontaneous food consumption, or in affective responses to shock itself. This selective VP<sup>GABA</sup> neuron  
520 involvement in motivated operant responding therefore extends beyond the pursuit of rewards, into  
521 avoidance of harm. Accordingly, when both opportunity and risk are present (as is usually the case in the  
522 natural world), VP<sup>GABA</sup> inhibition biased decision making toward a more conservative, risk-averse  
523 strategy. These results show that VP<sup>GABA</sup> neurons crucially influence high-stakes decision making, and  
524 thus likely contribute to both the normal desires of life, and to darker pursuits in those disorders of  
525 impaired judgement like addiction.

526

### 527 VP<sup>GABA</sup> Neuron Inhibition Promotes Conservative Decision Making

528 In a risky decision making task, chemogenetically inhibiting VP<sup>GABA</sup> neurons promoted selection of a  
529 small but safe option over a large but risky one, without impairing the ability to discriminate reward  
530 value. VP<sup>GABA</sup> inhibition also increased trial omissions and decreased the number of rewards obtained in  
531 the presence or absence of shock—consistent with decreased motivation for food. Similar increases in  
532 latency and omissions have been shown following optogenetic inhibition of all VP neurons in operant  
533 assays of sucrose seeking (Richard et al., 2016). Yet VP<sup>GABA</sup> inhibition effects were not merely  
534 motivational in nature—food seeking was not indiscriminately suppressed. Instead, VP<sup>GABA</sup> inhibited rats  
535 shifted more readily to a small but safe reward option, avoiding the large but risky one, even when the  
536 risk of shock was relatively low. Moreover, when rats did select the large/risky choice, VP<sup>GABA</sup> inhibition  
537 caused them to deliberate longer—an effect which was not present on trials when the small/safe option  
538 was chosen. In other words, inhibiting VP<sup>GABA</sup> neurons seemed to promote a more conservative, risk-  
539 averse decision making strategy.

540 Of course VP does not act alone to influence risky choice, but rather within wider mesocorticolimbic  
541 circuits to integrate motivational state with encountered opportunities and threats, in pursuit of  
542 generating maximally adaptive behavior under motivational conflict. Indeed, numerous brain regions  
543 contribute to risky decision making in rats, including prefrontal cortices, basolateral amygdala, lateral  
544 habenula, ventral tegmental area, and nucleus accumbens (NAc) (Floresco et al., 2008; Orsini et al.,  
545 2015b). Notably, lateral orbitofrontal cortex lesions have similar effects on latency and propensity to  
546 make a risky choice to VP<sup>GABA</sup> neuron inhibition effects seen here (Orsini et al., 2015a), implying

## VP GABA in Motivation During Risky Choice

547 functional (Simmons et al., 2014), if not direct anatomical interactions between these structures.  
548 Additionally, activating D2 dopamine receptors in VP's largest afferent input, the GABAergic NAc,  
549 similarly promotes risk-averse behavior in adolescent rats (Mitchell et al., 2014). Though infusion of a D2  
550 agonist in NAc would likely disinhibit (excite) VP neurons (Gallo et al., 2018), paradoxically we find here  
551 that *inhibiting* VP<sup>GABA</sup> neurons with DREADDs causes a similarly risk-averse phenotype. Reconciling these  
552 findings is an important future direction, and could involve experience-related plasticity in D1 (i.e.  
553 "direct pathway") versus D2 (i.e. "indirect pathway") inputs from NAc (Kupchik et al., 2015; Creed et al.,  
554 2016; Heinsbroek et al., 2017; O'Neal et al., 2019), differences between adolescent and adult decision  
555 making processes (Spear, 2000), currently-unknown specificity of NAc inputs to VP cell subpopulations  
556 (e.g. glutamate versus GABA), or non-NAc inputs to VP that may influence reward-seeking decisions  
557 (Richard et al., 2016; Ottenheimer et al., 2018).

### 558 Role for VP<sup>GABA</sup> Neurons in Seeking High Value Food, without Affecting Food Consumption

559 Having found that VP<sup>GABA</sup> neuron perturbation stifled risky choice, we next sought to determine how  
560 inhibiting these neurons impacts "pure" tests of food seeking and intake, in the absence of potential  
561 harm. VP's role in food ingestion and hedonics has been known for decades (Morgane, 1961; Stratford  
562 et al., 1999; Castro et al., 2015), though how VP neuronal subtypes participate in this was unclear. Here,  
563 we show that chemogenetically inhibiting VP<sup>GABA</sup> neurons suppresses operant pursuit of high-value  
564 foods like palatable pellets under both low and high effort conditions. In contrast, pursuit of less  
565 palatable chow was affected by VP<sup>GABA</sup> inhibition only when the food was valued because rats were  
566 hungry. These results suggest that VP<sup>GABA</sup> neurons selectively promote seeking of high-value rewards,  
567 regardless of whether value is instantiated by the inherent palatability of the food, by the presence of  
568 hunger, or by the necessity to pay a cost such as effortful responding, or potential for shock.

569  
570 Interestingly, whereas inhibiting VP<sup>GABA</sup> neurons decreased operant pursuit of valuable food rewards, it  
571 did not impair spontaneous consumption of palatable chocolate, suggesting that these neurons mediate  
572 instrumental *seeking* of high value rewards, but not necessarily *consumption* of the reward, once  
573 obtained. Neurobiological dissociation between seeking and consumption has been previously shown  
574 within ventral striatal networks. For example, intra-NAc dopamine antagonism diminishes operant  
575 reward seeking, but leaves reward consumption unimpaired (Kelley et al., 2005; Salamone and Correa,  
576 2012). Similarly, inhibiting VP impairs conditioned food or salt seeking, without impacting unconditioned  
577 consumption of these rewards (Farrar et al., 2008; Chang et al., 2017). Our results extend these findings,  
578 showing that VP<sup>GABA</sup> neurons in particular play a key role in pursuit, but not consumption of food.  
579 Notably, VP stimulation with opioid agonist or GABA antagonist drugs robustly increases chow  
580 consumption, and opioid drugs also enhance hedonic reactivity to sweet tastes (Smith and Berridge,  
581 2005, 2007). In addition, VP lesions suppress all food intake, and such lesioned animals will starve  
582 without forced feeding (Cromwell and Berridge, 1993). In this context, the present results could suggest  
583 lack of VP<sup>GABA</sup> neuron involvement in these effects, or could be a product of mechanistic differences  
584 between DREADDs and lesions, or other unknown factors.

### 585 586 VP<sup>GABA</sup> Neurons and Appetitive versus Aversive Motivation

587 A recent surge of studies suggest that VP<sup>GABA</sup> neurons promote appetitive behavior and reward, whereas  
588 intermingled VP glutamate neurons instead mediate withdrawal and aversion. For example, VP<sup>GABA</sup>  
589 neurons fire in response to water rewards and their predictors in mice, especially when those rewards  
590 are particularly valuable due to thirst (Stephenson-Jones et al., 2020). Optogenetic activation of mouse  
591 VP<sup>GABA</sup> neurons elicits food intake and operant water seeking (Zhu et al., 2017; Stephenson-Jones et al.,  
592 2020), and is reinforcing (Zhu et al., 2017; Faget et al., 2018), while optogenetic stimulation of VP

## VP GABA in Motivation During Risky Choice

593 glutamate neurons elicits aversive responses and promotes operant avoidance (Faget et al., 2018;  
594 Tooley et al., 2018; Levi et al., 2019; Stephenson-Jones et al., 2020), though a recent report suggests  
595 that VP glutamate neurons may mediate salience irrespective of valence (Wang et al., 2020). Though  
596 these prior mouse studies indicated no role for VP<sup>GABA</sup> neurons in aversive motivation, they did not  
597 examine more complex types of aversive responding.

598  
599 To address this issue further, we examined the contribution of VP<sup>GABA</sup> neurons to shock-induced  
600 affective responses, and to instrumental responding to avoid or escape shocks. Inhibiting VP<sup>GABA</sup> neurons  
601 failed to impact shock-induced motor reactions or ultrasonic vocalizations, suggesting that these cells do  
602 not mediate aversion *per se*. However, when rats were trained to press a lever either to avoid an  
603 impending shock or to escape an ongoing one, DREADD inhibition revealed a hidden role for VP<sup>GABA</sup>  
604 neurons in aversive motivation. Specifically, the latency to press a lever in order to cancel an impending  
605 shock was increased by VP<sup>GABA</sup> inhibition, while latency to press to escape an ongoing shock was  
606 unaffected. Together, these data show that VP<sup>GABA</sup> inhibition affected neither affective reactions to  
607 shock itself, nor the ability of an ongoing shock to induce escape responses. Instead, VP<sup>GABA</sup>-inhibited  
608 rats simply appeared to be less motivated to avoid impending punishment. This increase in avoidance  
609 latency represents a departure from the common notion that VP is solely implicated in appetitive  
610 behavior. Rather, VP<sup>GABA</sup> neurons seem instead to facilitate high-stakes instrumental behavior regardless  
611 of its emotional valence. This said, we note that when rats pressed to avoid footshock, they also  
612 received a 20 sec signal indicating freedom from impending threat. It is therefore possible that DREADD  
613 inhibition did not impact aversive motivation *per se*, but instead reduced the conditioned reinforcing  
614 properties of this safety signal (Fernando et al., 2014). Dissociating avoidance of harm from pursuit of  
615 safety is famously difficult (LeDoux et al., 2017; Sangha et al., 2020), so further work is needed to  
616 disambiguate this newly-discovered role for VP<sup>GABA</sup> neurons in aversive motivation.

### 617 618 Specificity of Effects

619 We found very little evidence of non-selective effects of CNO in WT rats without DREADDs. In the  
620 absence of DREADDs, CNO can have off-target behavioral effects in some experiments (Gomez et al.,  
621 2017; Mahler and Aston-Jones, 2018). Yet across the numerous behaviors tested here, we identified  
622 only a trend towards an increase in escape latency in WT rats—indicating predominantly DREADD-  
623 specific effects on CNO. In addition, although VP is sometimes considered a motor structure (Mogenson  
624 et al., 1980; Heimer et al., 1982), it is unlikely that VP<sup>GABA</sup> DREADD effects were due to nonspecific  
625 motoric inhibition. Neither horizontal locomotion nor rearing behavior were affected by engaging VP<sup>GABA</sup>  
626 DREADDs, and behavioral effects were specific to highly-motivated instrumental contexts—other  
627 behaviors like spontaneous chocolate intake, and pressing for chow in a sated state were unaffected.

### 628 629 Conclusion

630 These results demonstrate an essential role for VP<sup>GABA</sup> neurons in high-stakes motivated behavior—be it  
631 to pursue valued rewards, to avoid impending harm, or to make important decisions when motivations  
632 are mixed. We show for the first time that VP<sup>GABA</sup> neurons' role in motivation impacts cognition, since  
633 inhibiting these cells yields a conservative, risk-averse decision-making strategy rather than a simple  
634 decrease in all reward seeking. If successfully harnessed therapeutically, we speculate that suppressing  
635 VP<sup>GABA</sup> neuron activity might be useful for treating addiction, or other disorders of maladaptive, risky  
636 decision making.

### 637 **Acknowledgements**

## VP GABA in Motivation During Risky Choice

638 We would like to thank Erik Castillo and Christina Ruiz for technical assistance. We would also like to  
639 thank Andrew M. Delamater for helpful comments on these data.



VP GABA in Motivation During Risky Choice

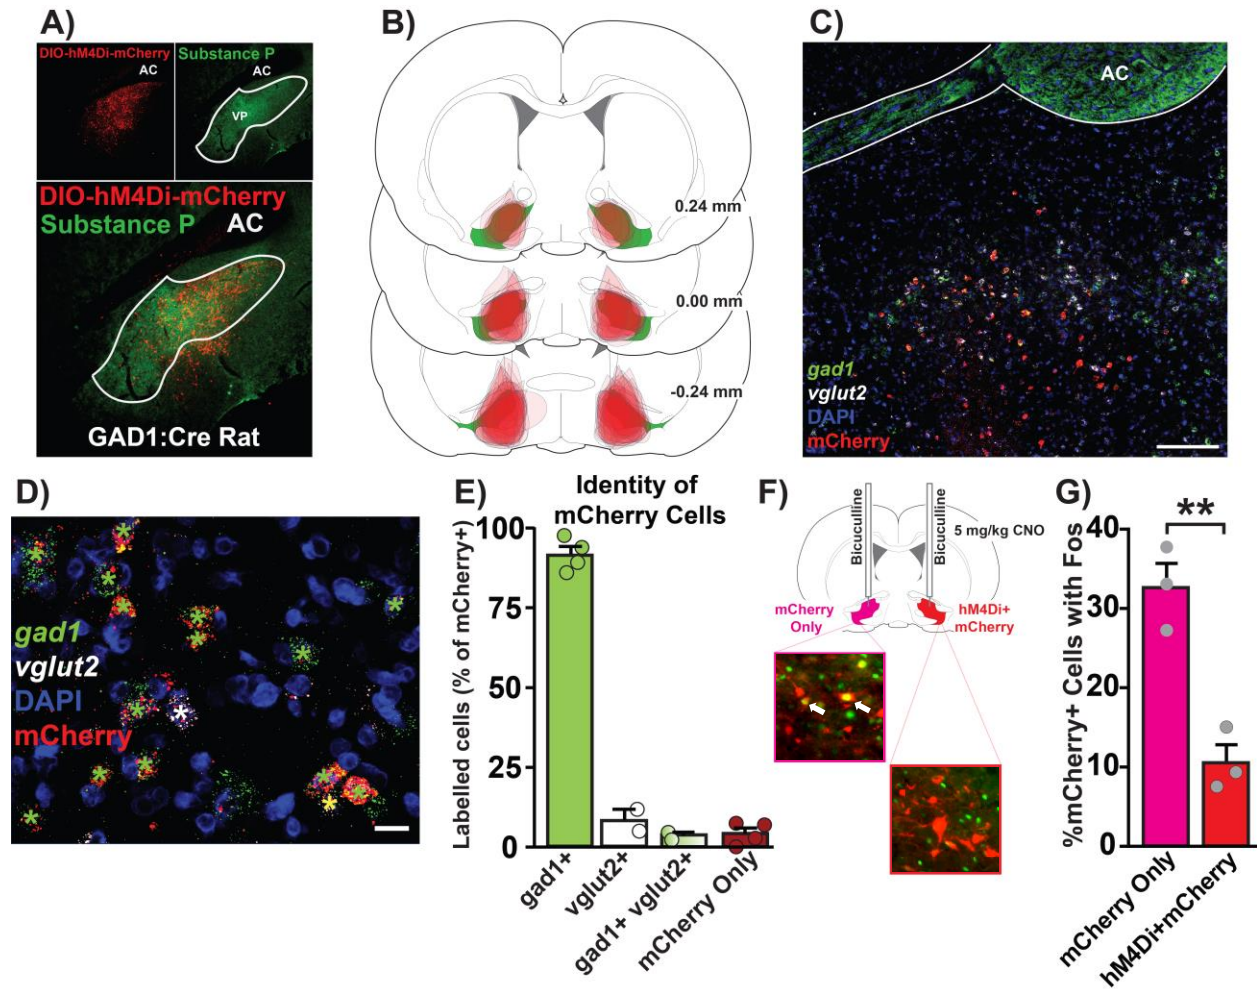

**Figure 1. Anatomical, cellular, and functional characterization of hM4Di DREADDs in VP<sup>GABA</sup> neurons.** **A)** Localization of DIO-hM4Di-mCherry in substance P-defined VP borders. Top left panel: DIO-hM4Di-mCherry in VP. Top right panel: substance P demarcates VP from surrounding basal forebrain. Bottom: Merged DIO-hM4Di-mCherry and substance P image. AC = anterior commissure **B)** Mapping of viral expression for each individual rat expressing hM4Di DREADDs. Numbers represent rostral/caudal coordinates relative to bregma. Green = substance P-defined VP. Red=DIO-hM4Di-mCherry expression. **C)** RNAscope fluorescent in situ hybridization for *gad1*, *vglut2* and *mCherry* mRNA, with DAPI co-stain. Scale bar = 200  $\mu$ m. **D)** Green star: mCherry+*gad1*; white star: mCherry+*vglut2*; yellow star: mCherry+*gad1*+*vglut2*. Scale bar = 20  $\mu$ m. **E)** Identity of mCherry cells in VP. mCherry cells localized largely with *gad1* mRNA (green bar), with fewer neurons expressing *vglut2* mRNA. A small population of mCherry+ neurons expressed both *gad1* and *vglut2* (green+white gradient), and some cells lacked *gad1* or *vglut2* mRNA and only expressed mCherry (red). **F)** Schematic illustrating bilateral bicuculline (0.01  $\mu$ g/0.5  $\mu$ L) microinjection and systemic CNO (5 mg/kg) in rats with ipsilateral mCherry and contralateral hM4Di+mCherry in VP<sup>GABA</sup> neurons (left image, Fos = green, red = mCherry; right image, Fos = green, red = hM4Di+mCherry). White arrows indicate colocalization of Fos in mCherry+ neurons. **G)** CNO reduced %mCherry+ cells colocalized with Fos in hM4Di+mCherry neurons compared with contralateral mCherry only neurons. \*\**p* < 0.01, independent sample *t*-test.

VP GABA in Motivation During Risky Choice

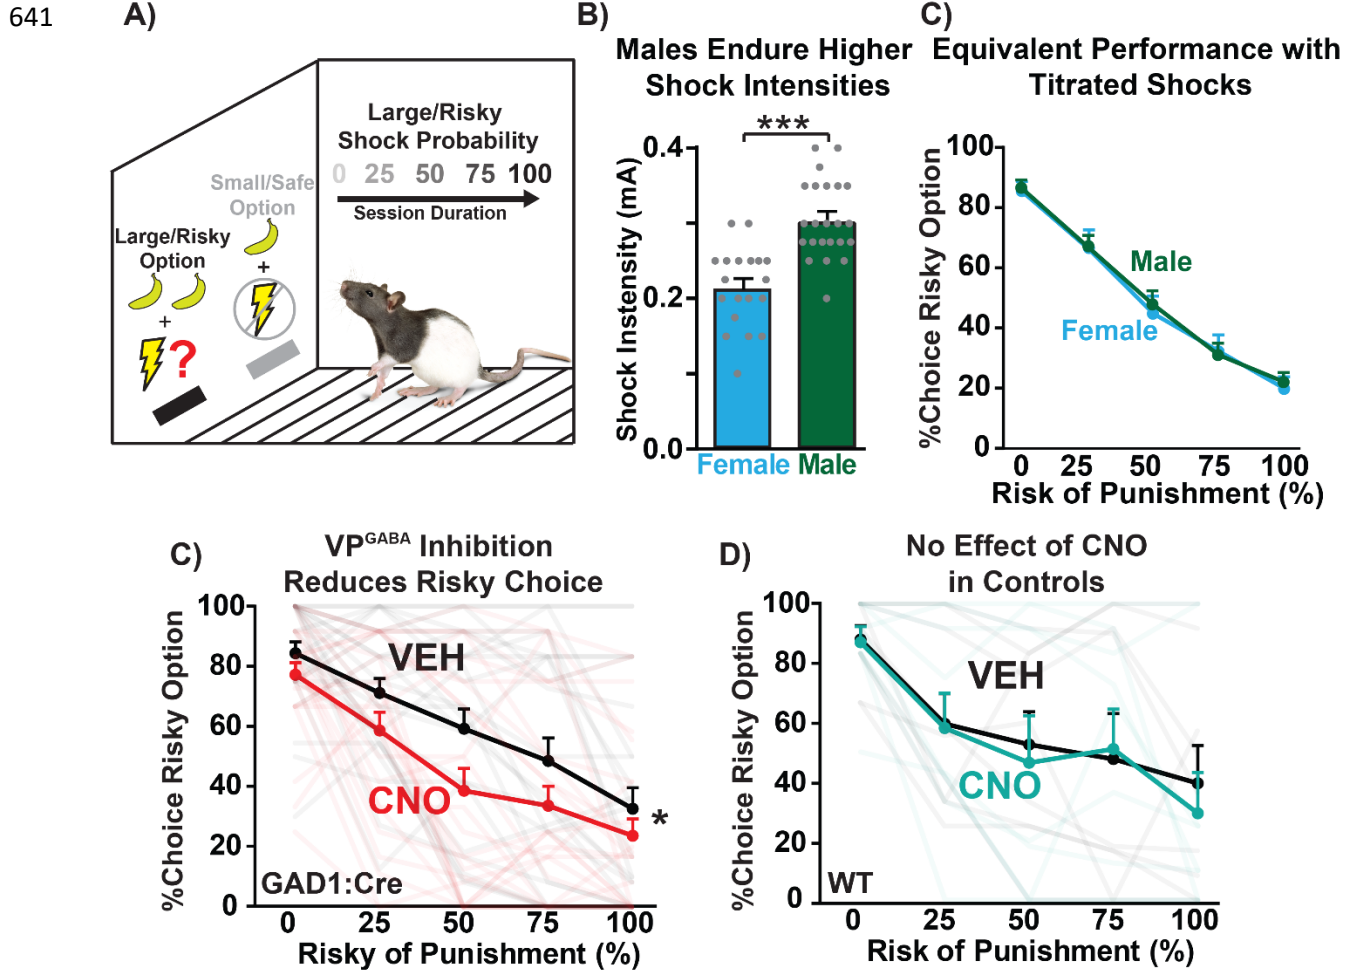

**Figure 2. Inhibiting VP<sup>GABA</sup> neurons reduces risky choice.** **A)** Schematic of risky decision task modified from (Simon et al., 2009). Sessions consisted of forced choice trials (1 available option; small/safe or large/risky) and free choice trials (2 available options; small/safe and large/risky), with ascending footshock probability associated selection of the large/risky reward option. **B)** Male rats required a higher shock intensity for appropriate performance of the risky decision task, as previously reported (Orsini et al., 2016). **C)** Equivalent average performance of male and female rats on the risky decision task with shock titration. **D)** GAD1:Cre rats administered CNO (red line) exhibit a decrease in %choice of the risky option relative to vehicle-treated rats (black line). **E)** No effect of CNO (teal line) in WT rats compared with vehicle treatment (black line). \*\*\* $p < 0.0001$ , Independent sample  $t$ -test; \* $p < 0.05$ , treatment main effect. Semi-transparent lines represent data from individual rats tested with CNO (red/teal) or vehicle (black).

## VP GABA in Motivation During Risky Choice

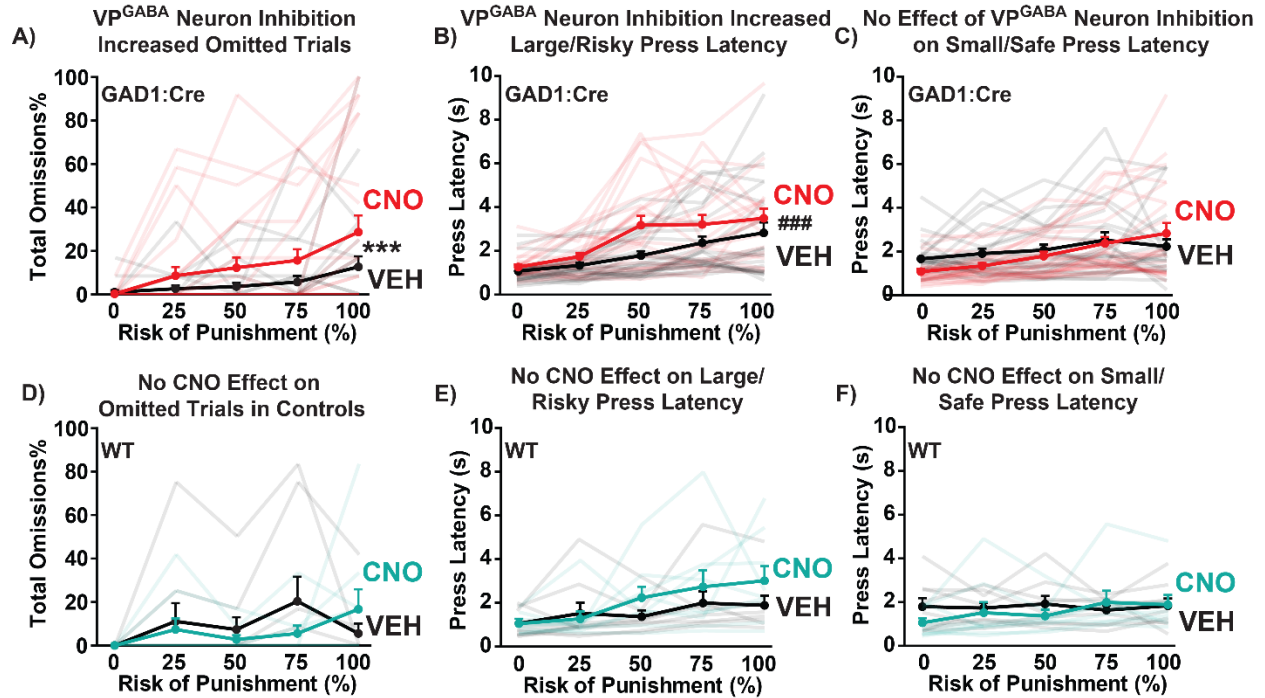

**Figure 3. VP<sup>GABA</sup> neuron inhibition increases trial omissions, and latency to select the large, risky option.** **A-C** In GAD1:Cre rats, CNO (red lines) increased the percentage of trials omitted on high-risk blocks ( $***p < 0.001$ , treatment x block interaction), and **B**) latency to press the large/risky reward lever ( $###p < 0.001$ , treatment main effect), relative to vehicle day in the same rats (black lines). In contrast, **C**) CNO in GAD1:Cre rats did not affect latency to press the small/safe reward lever. **D-F** In WT rats without VP DREADDs, CNO (teal lines) did not alter **D**) omissions, **E**) latency to press the large/risky reward lever, **F**) or latency to press the small/safe reward option, relative to vehicle day (black lines). Semi-transparent lines represent data from individual rats tested with CNO (red/teal) or vehicle (black).

## VP GABA in Motivation During Risky Choice

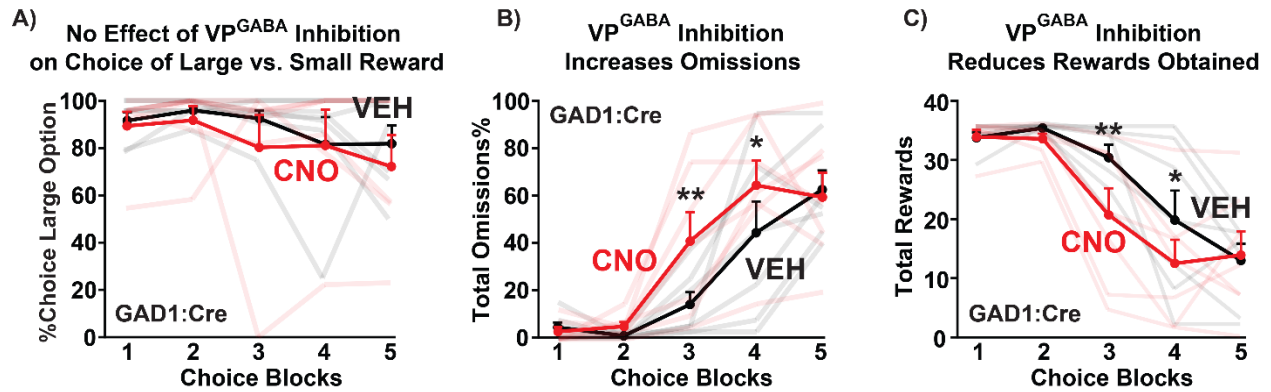

**Figure 4. Inhibiting VP<sup>GABA</sup> neurons spares the ability to choose between large and small rewards, while decreasing motivation. A)** CNO-treated GAD1:Cre rats (red line) showed no change in percentage choice of the large (2 pellets) versus small (1 pellet) reward option, compared with vehicle treatment (black line). **B)** GAD1:Cre rats omitted more trials during CNO tests (red line) compared with vehicle treatment (black line). **C)** CNO treatment in GAD1:Cre rats (red line) reduced rewards obtained relative to vehicle (black line). \* $p < 0.05$ , \*\* $p < 0.01$ , Sidak posthoc test. Semi-transparent lines represent data from individual rats tested with CNO (red/teal) or vehicle (black).

## VP GABA in Motivation During Risky Choice

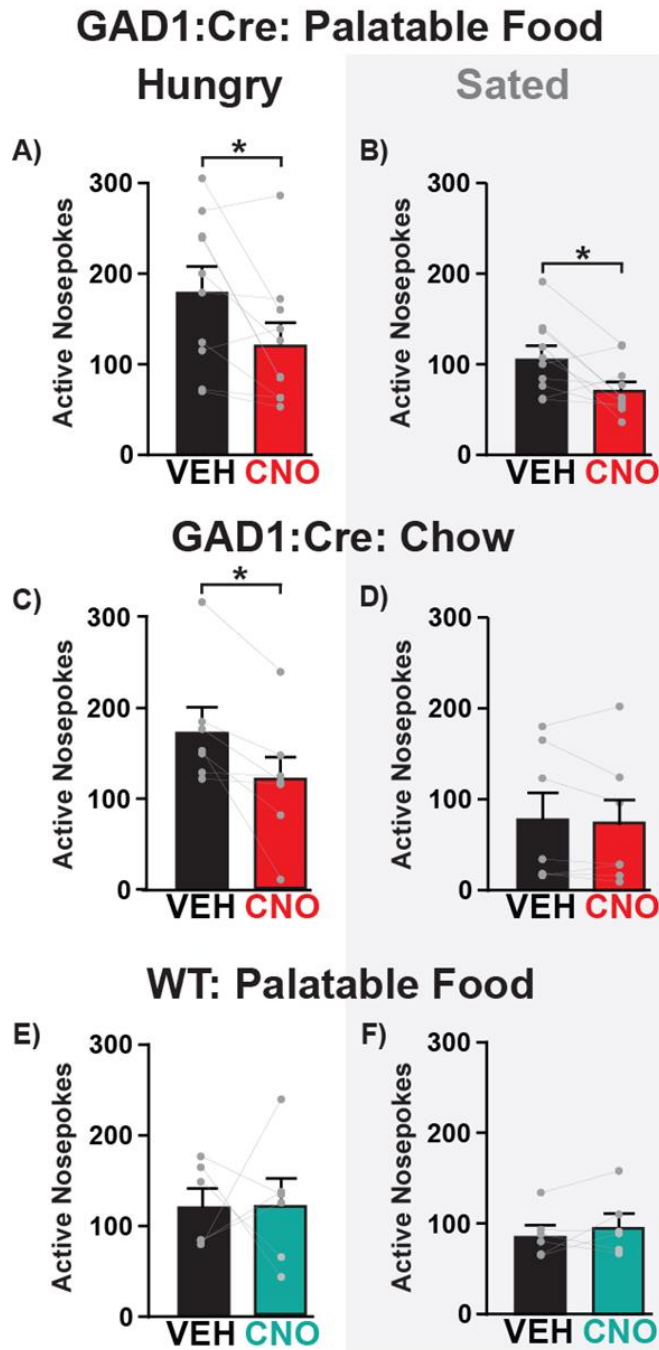

**Figure 5. Inhibiting VP<sup>GABA</sup> neurons reduces responding for palatable food and chow in hungry rats, but only reduces responding for palatable food (not chow) in sated rats. A-B)** In GAD1:Cre rats, CNO (red bars) reduced FR1 active nosepokes for palatable food in hungry rats (**A**) and sated rats (**B**) relative to vehicle treatment (black bars). **C-D)** CNO in GAD1:Cre rats (red bars) reduced FR1 active nosepokes for chow under hungry conditions (**C**) relative to vehicle (black bars), but not under sated conditions (**D**). **E-F)** No effect of CNO on active nosepokes in WT controls (teal bars) relative to vehicle treatment (black bars) under (**E**) hungry or (**F**) sated conditions. \* $p < 0.05$ , paired sample  $t$ -test.

VP GABA in Motivation During Risky Choice

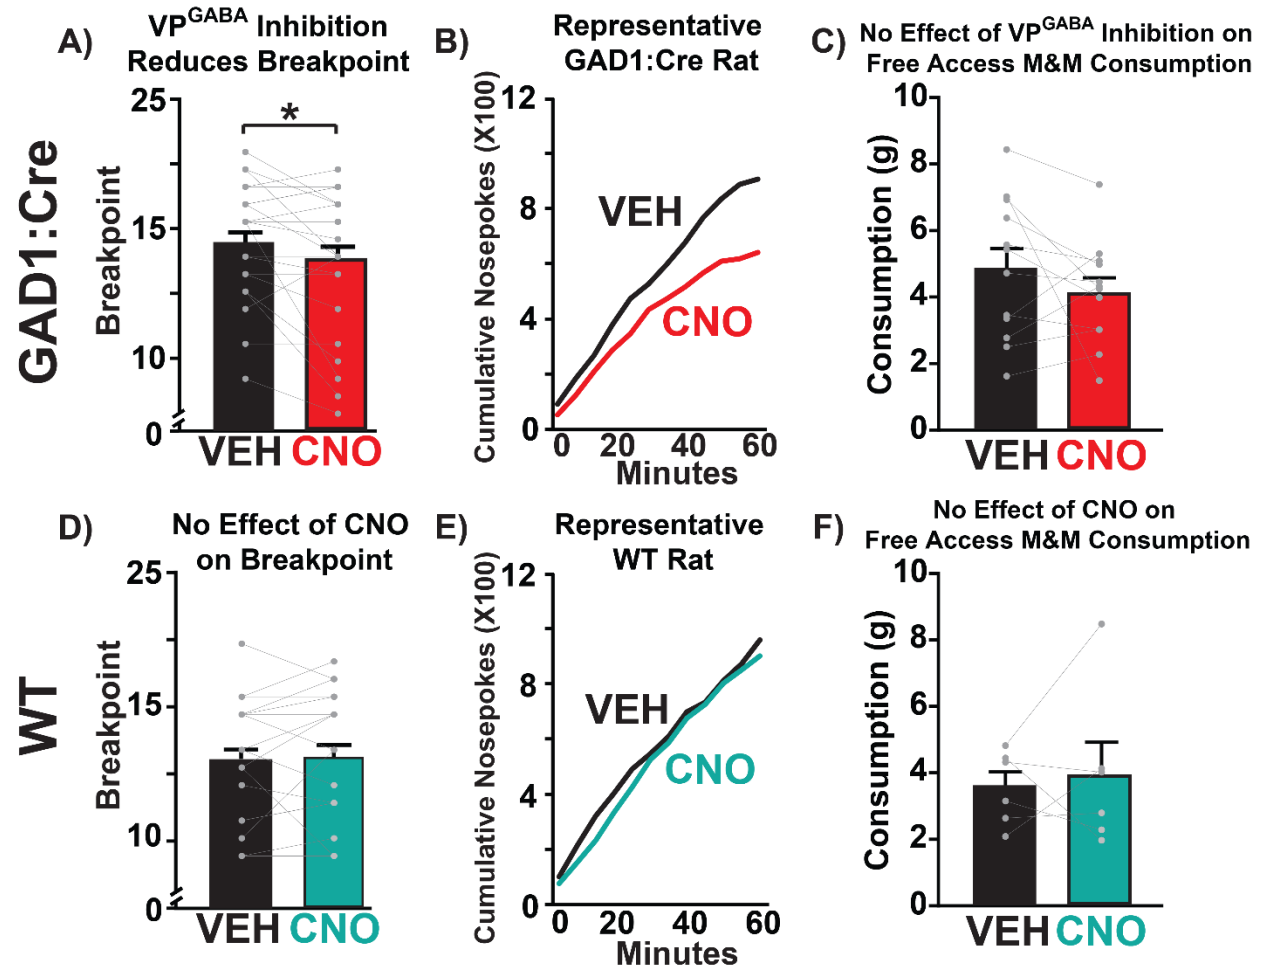

**Figure 6. Inhibiting VP<sup>GABA</sup> neurons reduces progressive ratio motivation for palatable food, without impairing free access palatable chocolate intake. A)** In GAD1:Cre rats, CNO (red bar) reduces breakpoint relative to vehicle (black bar). **B)** Cumulative nosepokes for a representative GAD1:Cre rat during vehicle (black line) and CNO (red line) progressive ratio tests. **C)** CNO in GAD1:Cre rats (red bar) fails to alter 1 hr free access M&M consumption, relative to vehicle test (black bar). **D)** In WT controls, CNO (teal bar) does not affect breakpoint compared with vehicle day (black bar). **E)** Cumulative nosepokes for representative WT rat during vehicle (black line) and CNO (teal line) progressive ratio tests. **F)** CNO in WT rats (teal bar) fails to alter 1 hr free access M&M consumption, relative to vehicle test (black bar). \* $p < 0.05$ , paired sample  $t$ -test.

VP GABA in Motivation During Risky Choice

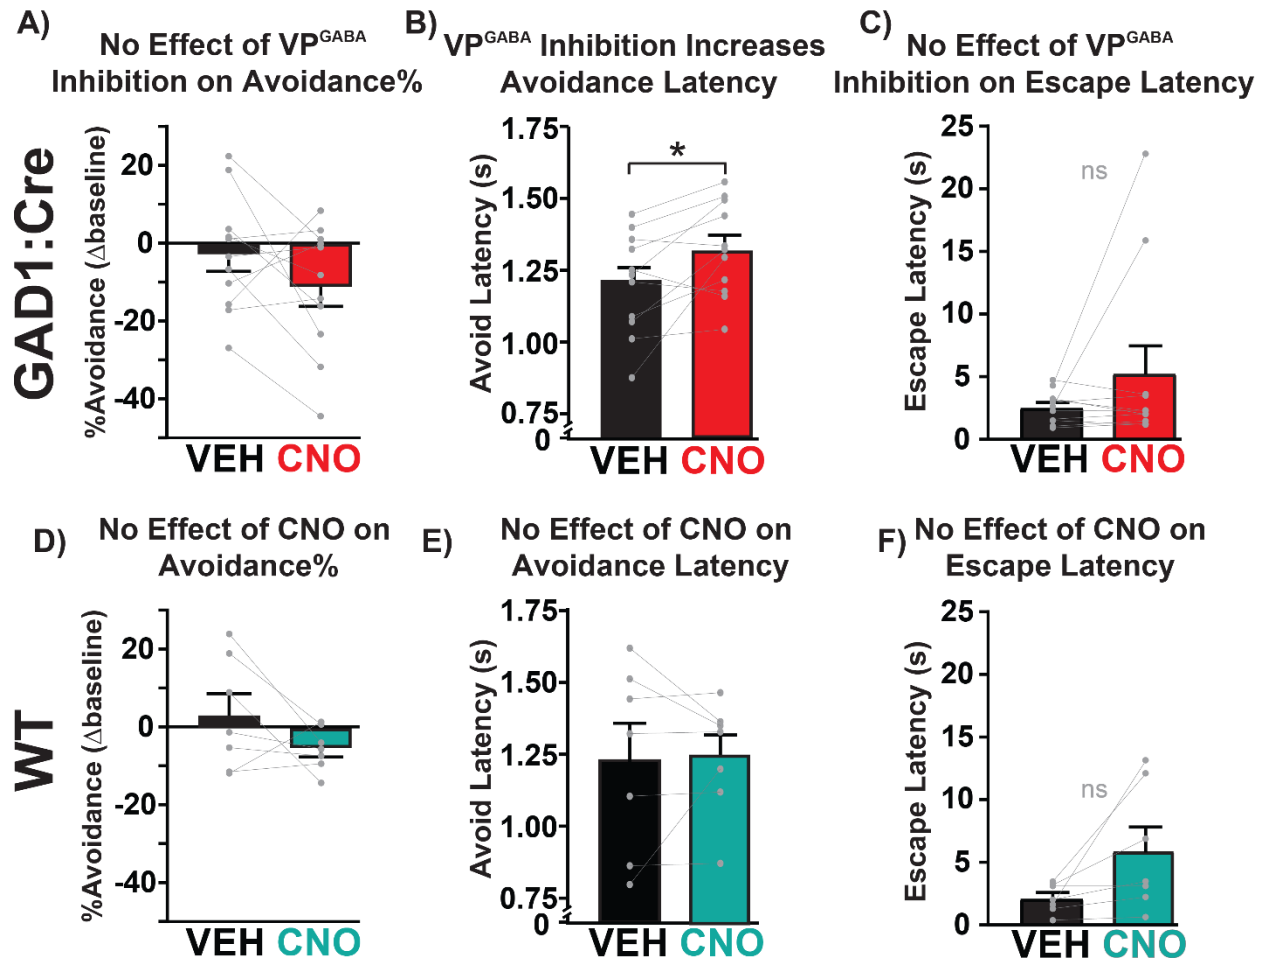

**Figure 7. Inhibiting VP<sup>GABA</sup> neurons increases avoidance latency without affecting avoidance% or escape latency.** **A)** CNO did not affect avoidance% in GAD1:Cre rats (red bar) relative to vehicle treatment (black bar) (change from avoidance% on vehicle/CNO test compared with the day before treatment). **B)** CNO increased latency to avoid in GAD1:Cre rats (red bar) compared with vehicle treatment (black bar). **C)** No effect of CNO on escape latency in GAD1:Cre rats. **D-F)** CNO in WT controls (teal bars) failed to impact **D)** avoidance%, **E)** avoidance latency, or **F)** escape latency relative to vehicle treatment (black bars). \* $p < 0.05$ , paired sample  $t$ -test.

## VP GABA in Motivation During Risky Choice

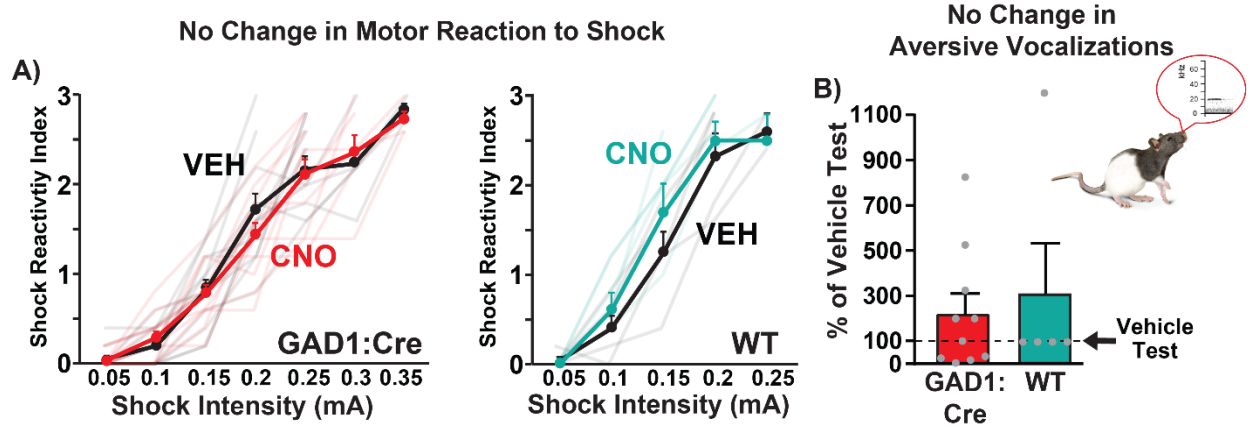

**Figure 8. Motor and affective reactions to footshock unaffected by inhibiting VP<sup>GABA</sup> neurons. A)** CNO in GAD1:Cre (red line, left panel) or in WT rats (teal line, right panel) did not impact shock reactivity index associated with ascending footshock administration relative to vehicle rats (black lines). **B)** CNO in GAD1:Cre rats (red bar) or WT controls (teal bar) failed to alter aversive 18-30 kHz ultrasonic vocalizations (change from vehicle test baseline) during high intensity footshock (0.75 mA) sessions.



## VP GABA in Motivation During Risky Choice

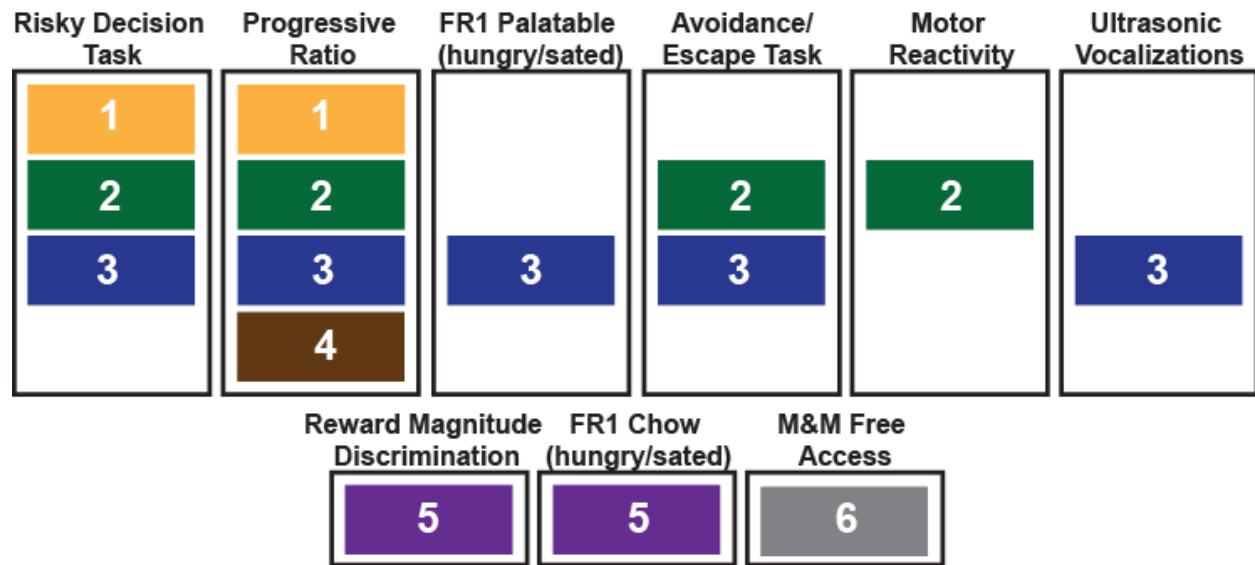

**Figure 2-1. Chronological order of behavioral testing for each cohort of rats.** Numbers/colors represent different behavioral cohorts of rats. Chronological order of behavioral testing organized left to right with particular behavioral test indicated above each box.

648

## VP GABA in Motivation During Risky Choice

649

### References

- 650 Armbruster BN, Li X, Pausch MH, Herlitze S, Roth BL (2007) Evolving the lock to fit the key to create a  
651 family of G protein-coupled receptors potently activated by an inert ligand. *Proceedings of the*  
652 *National Academy of Sciences* 104:5163-5168.
- 653 Berridge KC, Kringelbach ML (2015) Pleasure systems in the brain. *Neuron* 86:646-664.
- 654 Bonnet KA, Peterson KE (1975) A modification of the jump-flinch technique for measuring pain  
655 sensitivity in rats. *Pharmacology Biochemistry and Behavior* 3:47-55.
- 656 Brudzynski SM (2013) Ethotransmission: communication of emotional states through ultrasonic  
657 vocalization in rats. *Current opinion in neurobiology* 23:310-317.
- 658 Castro DC, Cole SL, Berridge KC (2015) Lateral hypothalamus, nucleus accumbens, and ventral pallidum  
659 roles in eating and hunger: interactions between homeostatic and reward circuitry. *Frontiers in*  
660 *systems neuroscience* 9:90.
- 661 Chang SE, Todd TP, Bucci DJ, Smith KS (2015) Chemogenetic manipulation of ventral pallidal neurons  
662 impairs acquisition of sign-tracking in rats. *European Journal of Neuroscience* 42:3105-3116.
- 663 Chang SE, Smedley EB, Stansfield KJ, Stott JJ, Smith KS (2017) Optogenetic inhibition of ventral pallidum  
664 neurons impairs context-driven salt seeking. *Journal of Neuroscience* 37:5670-5680.
- 665 Creed M, Ntamati NR, Chandra R, Lobo MK, Lüscher C (2016) Convergence of reinforcing and anhedonic  
666 cocaine effects in the ventral pallidum. *Neuron* 92:214-226.
- 667 Cromwell HC, Berridge KC (1993) Where does damage lead to enhanced food aversion: the ventral  
668 pallidum/substantia innominata or lateral hypothalamus? *Brain research* 624:1-10.
- 669 Faget L, Zell V, Souter E, McPherson A, Ressler R, Gutierrez-Reed N, Yoo JH, Dulcis D, Hnasko TS (2018)  
670 Opponent control of behavioral reinforcement by inhibitory and excitatory projections from the  
671 ventral pallidum. *Nature communications* 9:849.
- 672 Farrar AM, Font L, Pereira M, Mingote S, Bunce JG, Chrobak JJ, Salamone JD (2008) Forebrain circuitry  
673 involved in effort-related choice: Injections of the GABA<sub>A</sub> agonist muscimol into ventral  
674 pallidum alter response allocation in food-seeking behavior. *Neuroscience* 152:321-330.
- 675 Farrell MR, Ruiz CM, Castillo E, Faget L, Khanbijiyan C, Liu S, Schoch H, Rojas G, Huerta MY, Hnasko TS  
676 (2019) Ventral pallidum is essential for cocaine relapse after voluntary abstinence in rats.  
677 *Neuropsychopharmacology*:1-13.
- 678 Fernando ABP, Urcelay GP, Mar AC, Dickinson A, Robbins TW (2014) Safety signals as instrumental  
679 reinforcers during free-operant avoidance. *Learning & Memory* 21:488-497.
- 680 Floresco SB, Braaksma DN, Phillips AG (1999) Involvement of the ventral pallidum in working memory  
681 tasks with or without a delay. *Annals of the New York Academy of Sciences* 877:711-716.
- 682 Floresco SB, Onge JRS, Ghods-Sharifi S, Winstanley CA (2008) Cortico-limbic-striatal circuits subserving  
683 different forms of cost-benefit decision making. *Cognitive, Affective, & Behavioral Neuroscience*  
684 8:375-389.
- 685 Fujimoto A, Hori Y, Nagai Y, Kikuchi E, Oyama K, Suhara T, Minamimoto T (2019) Signaling incentive and  
686 drive in the primate ventral pallidum for motivational control of goal-directed action. *Journal of*  
687 *Neuroscience* 39:1793-1804.
- 688 Gallo EF, Meszaros J, Sherman JD, Chohan MO, Teboul E, Choi CS, Moore H, Javitch JA, Kellendonk C  
689 (2018) Accumbens dopamine D2 receptors increase motivation by decreasing inhibitory  
690 transmission to the ventral pallidum. *Nature communications* 9:1086.
- 691 Gibson GD, Prasad AA, Jean-Richard-dit-Bressel P, Yau JOY, Millan EZ, Liu Y, Campbell EJ, Lim J, Marchant  
692 NJ, Power JM (2018) Distinct accumbens shell output pathways promote versus prevent relapse  
693 to alcohol seeking. *Neuron* 98:512-520.

## VP GABA in Motivation During Risky Choice

- 694 Gomez JL, Bonaventura J, Lesniak W, Mathews WB, Sysa-Shah P, Rodriguez LA, Ellis RJ, Richie CT, Harvey  
695 BK, Dannals RF (2017) Chemogenetics revealed: DREADD occupancy and activation via  
696 converted clozapine. *Science* 357:503-507.
- 697 Heimer L, Switzer RD, Van Hoesen GW (1982) Ventral striatum and ventral pallidum: Components of the  
698 motor system? *Trends in Neurosciences* 5:83-87.
- 699 Heinsbroek J, Bobadilla A-C, Dereschewitz E, Assali A, Chalhoub RM, Cowan CW, Kalivas PW (2019)  
700 Opposing Regulation of Cocaine Seeking by Glutamate and Enkephalin Neurons in the Ventral  
701 Pallidum. *CELL-REPORTS-D-19-03631*.
- 702 Heinsbroek JA, Neuhofer DN, Griffin WC, Siegel GS, Bobadilla A-C, Kupchik YM, Kalivas PW (2017) Loss of  
703 plasticity in the D2-accumbens pallidal pathway promotes cocaine seeking. *Journal of*  
704 *Neuroscience* 37:757-767.
- 705 Kelley AE, Baldo BA, Pratt WE, Will MJ (2005) Corticostriatal-hypothalamic circuitry and food motivation:  
706 integration of energy, action and reward. *Physiology & behavior* 86:773-795.
- 707 Knutson B, Burgdorf J, Panksepp J (2002) Ultrasonic vocalizations as indices of affective states in rats.  
708 *Psychological bulletin* 128:961.
- 709 Kupchik YM, Brown RM, Heinsbroek JA, Lobo MK, Schwartz DJ, Kalivas PW (2015) Coding the  
710 direct/indirect pathways by D1 and D2 receptors is not valid for accumbens projections. *Nature*  
711 *neuroscience* 18:1230.
- 712 LeDoux JE, Moscarello J, Sears R, Campese V (2017) The birth, death and resurrection of avoidance: a  
713 reconceptualization of a troubled paradigm. *Molecular psychiatry* 22:24-36.
- 714 Levi LA, Inbar K, Nachshon N, Bernat N, Gatterer A, Inbar D, Kupchik YM (2019) Projection-specific  
715 potentiation of ventral pallidal glutamatergic outputs after abstinence from cocaine. *Journal of*  
716 *Neuroscience*.
- 717 Mahler SV, Aston-Jones G (2018) CNO Evil? Considerations for the use of DREADDs in behavioral  
718 neuroscience. *Neuropsychopharmacology* 43:934.
- 719 Mahler SV, Smith RJ, Aston-Jones G (2013a) Interactions between VTA orexin and glutamate in cue-  
720 induced reinstatement of cocaine seeking in rats. *Psychopharmacology* 226:687-698.
- 721 Mahler SV, Moorman DE, Feltenstein MW, Cox BM, Ogburn KB, Bachar M, McGonigal JT, Ghee SM, See  
722 RE (2013b) A rodent “self-report” measure of methamphetamine craving? Rat ultrasonic  
723 vocalizations during methamphetamine self-administration, extinction, and reinstatement.  
724 *Behavioural brain research* 236:78-89.
- 725 Mahler SV, Vazey EM, Beckley JT, Keistler CR, McGlinchey EM, Kaufling J, Wilson SP, Deisseroth K,  
726 Woodward JJ, Aston-Jones G (2014) Designer receptors show role for ventral pallidum input to  
727 ventral tegmental area in cocaine seeking. *Nature neuroscience* 17:577.
- 728 Mahler SV, Brodnik ZD, Cox BM, Buchta WC, Bentzley BS, Quintanilla J, Cope ZA, Lin EC, Riedy MD,  
729 Scofield MD (2019) Chemogenetic Manipulations of Ventral Tegmental Area Dopamine Neurons  
730 Reveal Multifaceted Roles in Cocaine Abuse. *Journal of Neuroscience* 39:503-518.
- 731 McAlonan GM, Robbins TW, Everitt BJ (1993) Effects of medial dorsal thalamic and ventral pallidal  
732 lesions on the acquisition of a conditioned place preference: further evidence for the  
733 involvement of the ventral striatopallidal system in reward-related processes. *Neuroscience*  
734 52:605-620.
- 735 Mitchell MR, Weiss VG, Beas BS, Morgan D, Bizon JL, Setlow B (2014) Adolescent risk taking, cocaine  
736 self-administration, and striatal dopamine signaling. *Neuropsychopharmacology* 39:955.
- 737 Mogenson GJ, Jones DL, Yim CY (1980) From motivation to action: functional interface between the  
738 limbic system and the motor system. *Progress in neurobiology* 14:69-97.
- 739 Morgane PJ (1961) Alterations in feeding and drinking behavior of rats with lesions in globi pallidi.  
740 *American Journal of Physiology-Legacy Content* 201:420-428.

## VP GABA in Motivation During Risky Choice

- 741 Oleson EB, Gentry RN, Chioma VC, Cheer JF (2012) Subsecond dopamine release in the nucleus  
742 accumbens predicts conditioned punishment and its successful avoidance. *Journal of*  
743 *Neuroscience* 32:14804-14808.
- 744 Orsini CA, Trotta RT, Bizon JL, Setlow B (2015a) Dissociable roles for the basolateral amygdala and  
745 orbitofrontal cortex in decision-making under risk of punishment. *Journal of Neuroscience*  
746 35:1368-1379.
- 747 Orsini CA, Moorman DE, Young JW, Setlow B, Floresco SB (2015b) Neural mechanisms regulating  
748 different forms of risk-related decision-making: Insights from animal models. *Neuroscience &*  
749 *Biobehavioral Reviews* 58:147-167.
- 750 Orsini CA, Willis ML, Gilbert RJ, Bizon JL, Setlow B (2016) Sex differences in a rat model of risky decision  
751 making. *Behavioral neuroscience* 130:50.
- 752 Orsini CA, Hernandez CM, Singhal S, Kelly KB, Frazier CJ, Bizon JL, Setlow B (2017) Optogenetic inhibition  
753 reveals distinct roles for basolateral amygdala activity at discrete time points during risky  
754 decision making. *Journal of Neuroscience* 37:11537-11548.
- 755 Ottenheimer D, Richard JM, Janak PH (2018) Ventral pallidum encodes relative reward value earlier and  
756 more robustly than nucleus accumbens. *Nature communications* 9:4350.
- 757 O'Neal TJ, Nooney MN, Thien K, Ferguson SM (2019) Chemogenetic modulation of accumbens direct or  
758 indirect pathways bidirectionally alters reinstatement of heroin-seeking in high-but not low-risk  
759 rats. *Neuropsychopharmacology*:1-12.
- 760 Paxinos G, Watson C (2006) *The rat brain in stereotaxic coordinates: hard cover edition*: Elsevier.
- 761 Pessiglione M, Schmidt L, Draganski B, Kalisch R, Lau H, Dolan RJ, Frith CD (2007) How the brain  
762 translates money into force: a neuroimaging study of subliminal motivation. *Science* 316:904-  
763 906.
- 764 Pleil KE, Rinker JA, Lowery-Gionta EG, Mazzone CM, McCall NM, Kendra AM, Olson DP, Lowell BB, Grant  
765 KA, Thiele TE (2015) NPY signaling inhibits extended amygdala CRF neurons to suppress binge  
766 alcohol drinking. *Nature neuroscience* 18:545-552.
- 767 Portfors CV (2007) Types and functions of ultrasonic vocalizations in laboratory rats and mice. *Journal of*  
768 *the American Association for Laboratory Animal Science* 46:28-34.
- 769 Prasad AA, McNally GP (2020) The ventral pallidum and relapse to alcohol seeking. *British Journal of*  
770 *Pharmacology*.
- 771 Richard JM, Ambroggi F, Janak PH, Fields HL (2016) Ventral pallidum neurons encode incentive value and  
772 promote cue-elicited instrumental actions. *Neuron* 90:1165-1173.
- 773 Rogers JL, Ghee S, See RE (2008) The neural circuitry underlying reinstatement of heroin-seeking  
774 behavior in an animal model of relapse. *Neuroscience* 151:579-588.
- 775 Root DH, Melendez RI, Zaborszky L, Napier TC (2015) The ventral pallidum: Subregion-specific functional  
776 anatomy and roles in motivated behaviors. *Progress in neurobiology* 130:29-70.
- 777 Roth BL (2016) DREADDs for neuroscientists. *Neuron* 89:683-694.
- 778 Saga Y, Richard A, Sgambato-Faure V, Hoshi E, Tobler PN, Tremblay L (2016) Ventral pallidum encodes  
779 contextual information and controls aversive behaviors. *Cerebral Cortex* 27:2528-2543.
- 780 Salamone JD, Correa M (2012) The mysterious motivational functions of mesolimbic dopamine. *Neuron*  
781 76:470-485.
- 782 Sangha S, Diehl MM, Bergstrom HC, Drew MR (2020) Know safety, no fear. *Neuroscience &*  
783 *Biobehavioral Reviews* 108:218-230.
- 784 Sharpe MJ, Marchant NJ, Whitaker LR, Richie CT, Zhang YJ, Campbell EJ, Koivula PP, Necarsulmer JC,  
785 Mejias-Aponte C, Morales M (2017) Lateral hypothalamic GABAergic neurons encode reward  
786 predictions that are relayed to the ventral tegmental area to regulate learning. *Current Biology*  
787 27:2089-2100.

## VP GABA in Motivation During Risky Choice

- 788 Simmons WK, Rapuano KM, Ingeholm JE, Avery J, Kallman S, Hall KD, Martin A (2014) The ventral  
789 pallidum and orbitofrontal cortex support food pleasantness inferences. *Brain Structure and*  
790 *Function* 219:473-483.
- 791 Simon NW, Setlow B (2012) Modeling risky decision making in rodents. In: *Psychiatric Disorders*, pp 165-  
792 175: Springer.
- 793 Simon NW, Gilbert RJ, Mayse JD, Bizon JL, Setlow B (2009) Balancing risk and reward: a rat model of risky  
794 decision making. *Neuropsychopharmacology* 34:2208.
- 795 Smith KS, Berridge KC (2005) The ventral pallidum and hedonic reward: neurochemical maps of sucrose  
796 “liking” and food intake. *Journal of neuroscience* 25:8637-8649.
- 797 Smith KS, Berridge KC (2007) Opioid limbic circuit for reward: interaction between hedonic hotspots of  
798 nucleus accumbens and ventral pallidum. *Journal of neuroscience* 27:1594-1605.
- 799 Smith KS, Tindell AJ, Aldridge JW, Berridge KC (2009) Ventral pallidum roles in reward and motivation.  
800 *Behavioural brain research* 196:155-167.
- 801 Smith RJ, Aston-Jones G (2012) Orexin/hypocretin 1 receptor antagonist reduces heroin self-  
802 administration and cue-induced heroin seeking. *European Journal of Neuroscience* 35:798-804.
- 803 Spear LP (2000) The adolescent brain and age-related behavioral manifestations. *Neuroscience &*  
804 *biobehavioral reviews* 24:417-463.
- 805 Stephenson-Jones M, Bravo-Rivera C, Ahrens S, Furlan A, Xiao X, Fernandes-Henriques C, Li B (2020)  
806 Opposing contributions of GABAergic and glutamatergic ventral pallidal neurons to motivational  
807 behaviors. *Neuron* 105:921-933.
- 808 Stratford TR, Kelley AE, Simansky KJ (1999) Blockade of GABA<sub>A</sub> receptors in the medial ventral pallidum  
809 elicits feeding in satiated rats. *Brain research* 825:199-203.
- 810 Tachibana Y, Hikosaka O (2012) The primate ventral pallidum encodes expected reward value and  
811 regulates motor action. *Neuron* 76:826-837.
- 812 Tindell AJ, Smith KS, Berridge KC, Aldridge JW (2009) Dynamic computation of incentive  
813 salience: “wanting” what was never “liked”. *Journal of Neuroscience* 29:12220-12228.
- 814 Tooley J, Marconi L, Alipio JB, Matikainen-Ankney B, Georgiou P, Kravitz AV, Creed MC (2018)  
815 Glutamatergic ventral pallidal neurons modulate activity of the habenula–tegmental circuitry  
816 and constrain reward seeking. *Biological psychiatry* 83:1012-1023.
- 817 Turner MS, Gray TS, Mickiewicz AL, Napier TC (2008) Fos expression following activation of the ventral  
818 pallidum in normal rats and in a model of Parkinson’s Disease: implications for limbic system and  
819 basal ganglia interactions. *Brain Structure and Function* 213:197-213.
- 820 Wakabayashi KT, Feja M, Baidur AN, Bruno MJ, Bhimani RV, Park J, Hausknecht K, Shen R-Y, Haj-  
821 Dahmane S, Bass CE (2019) Chemogenetic activation of ventral tegmental area GABA neurons,  
822 but not mesoaccumbal GABA terminals, disrupts responding to reward-predictive cues.  
823 *Neuropsychopharmacology* 44:372.
- 824 Wang F, Zhang J, Yuan Y, Chen M, Gao Z, Zhan S, Fan C, Sun W, Hu J (2020) Salience processing by  
825 glutamatergic neurons in the ventral pallidum. *Science Bulletin* 65:389-401.
- 826 Zhu C, Yao Y, Xiong Y, Cheng M, Chen J, Zhao R, Liao F, Shi R, Song S (2017) Somatostatin neurons in the  
827 basal forebrain promote high-calorie food intake. *Cell reports* 20:112-123.

828
